# Supplementary figures and images for: Myoglobin primary structure reveals multiple convergent transitions to semi-aquatic life in the world's smallest mammalian divers
Source: eLife journal article supplement (doi:10.7554/elife.66797), 2021-05-05

- fossorial
- semi-aquatic
- semi-fossorial
- terrestrial

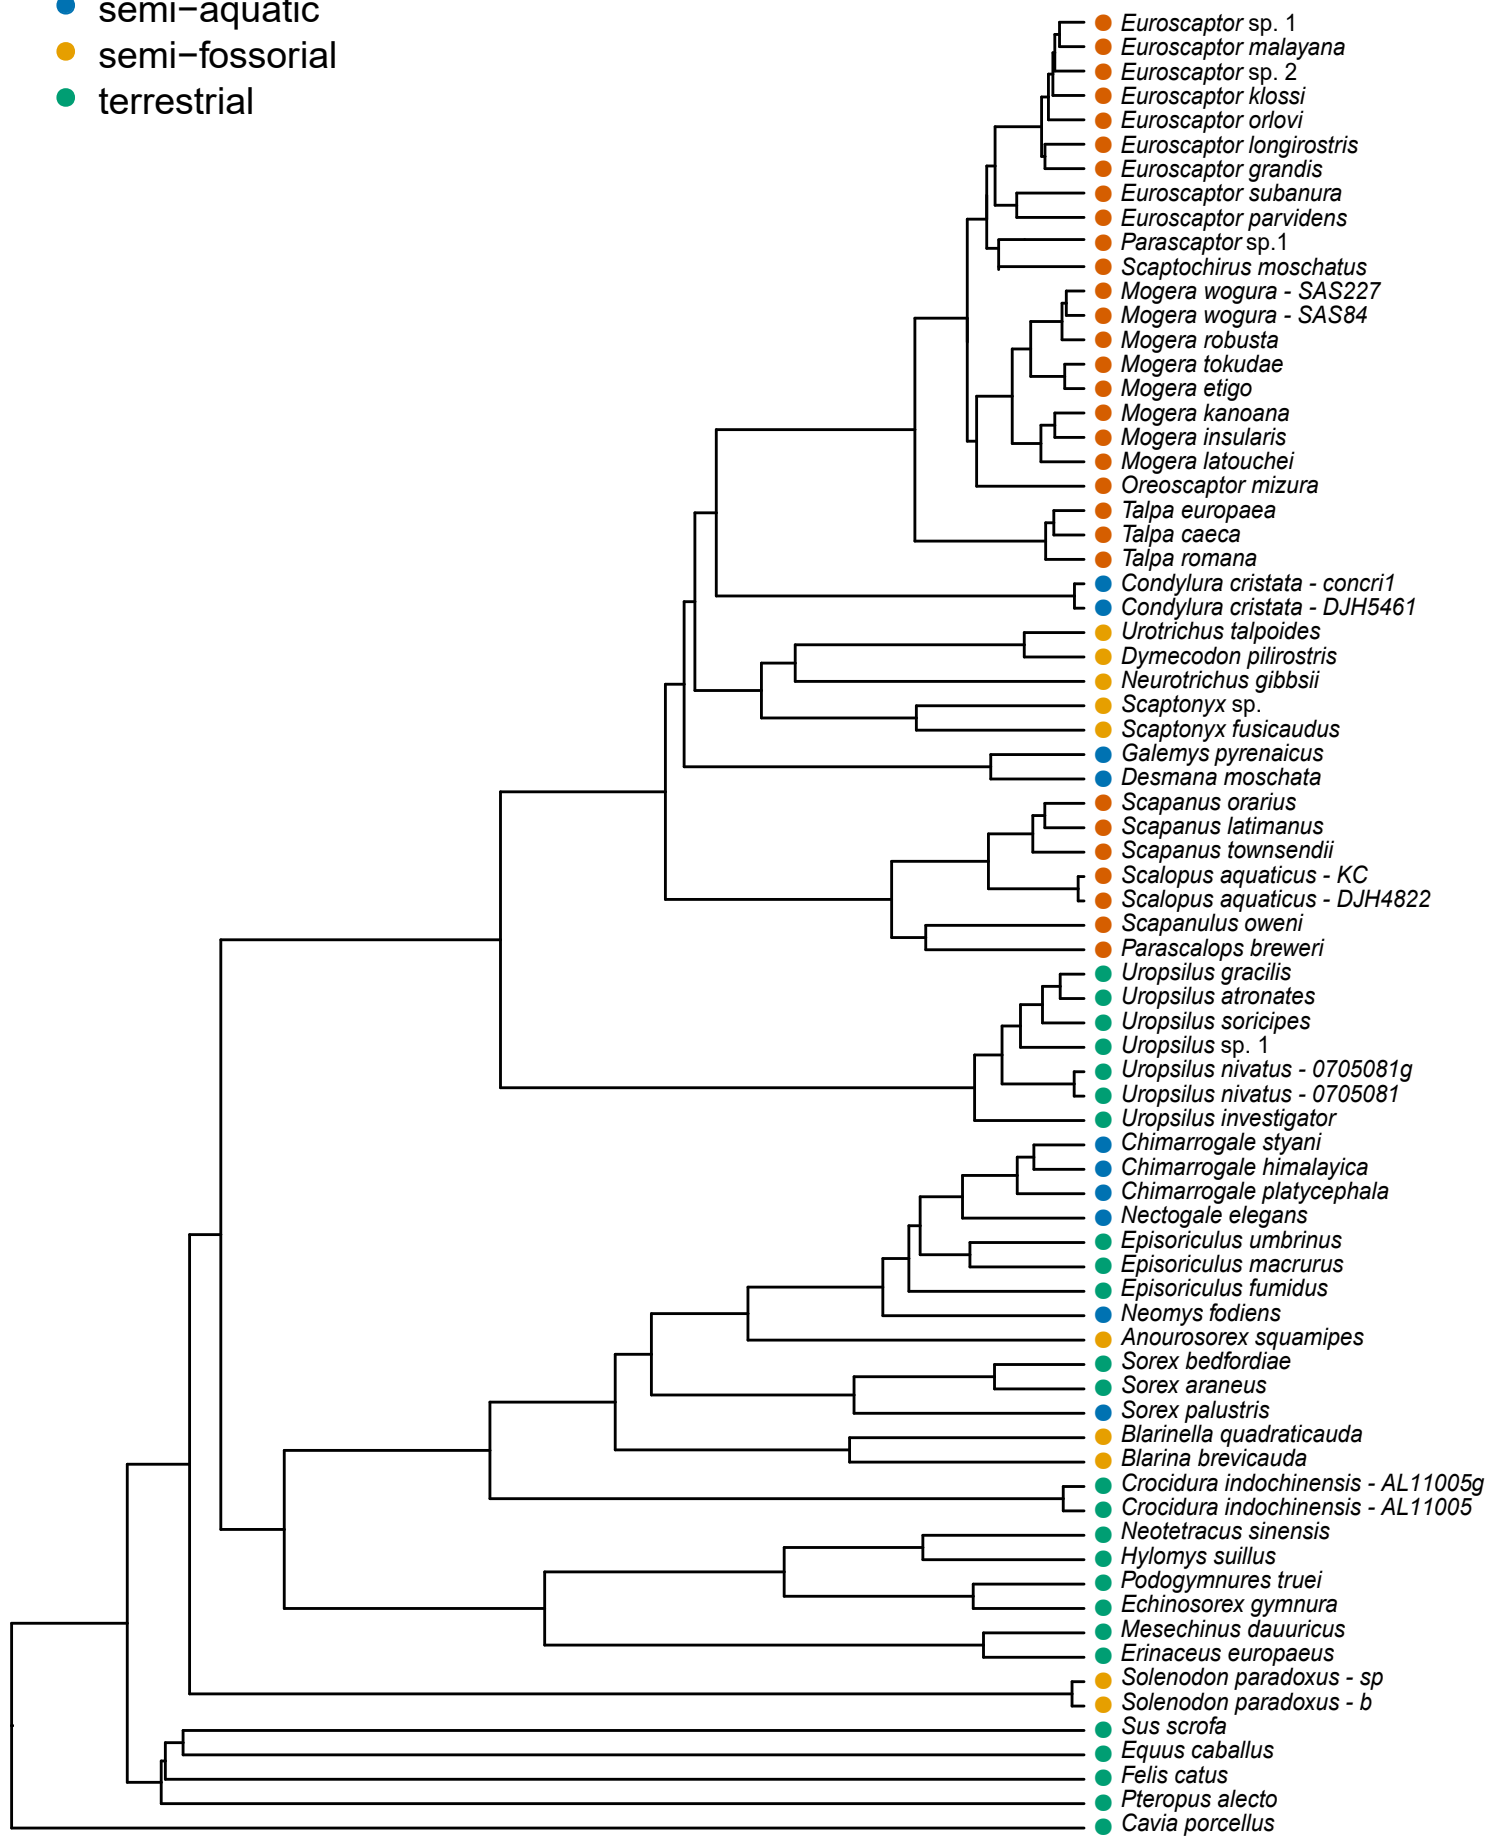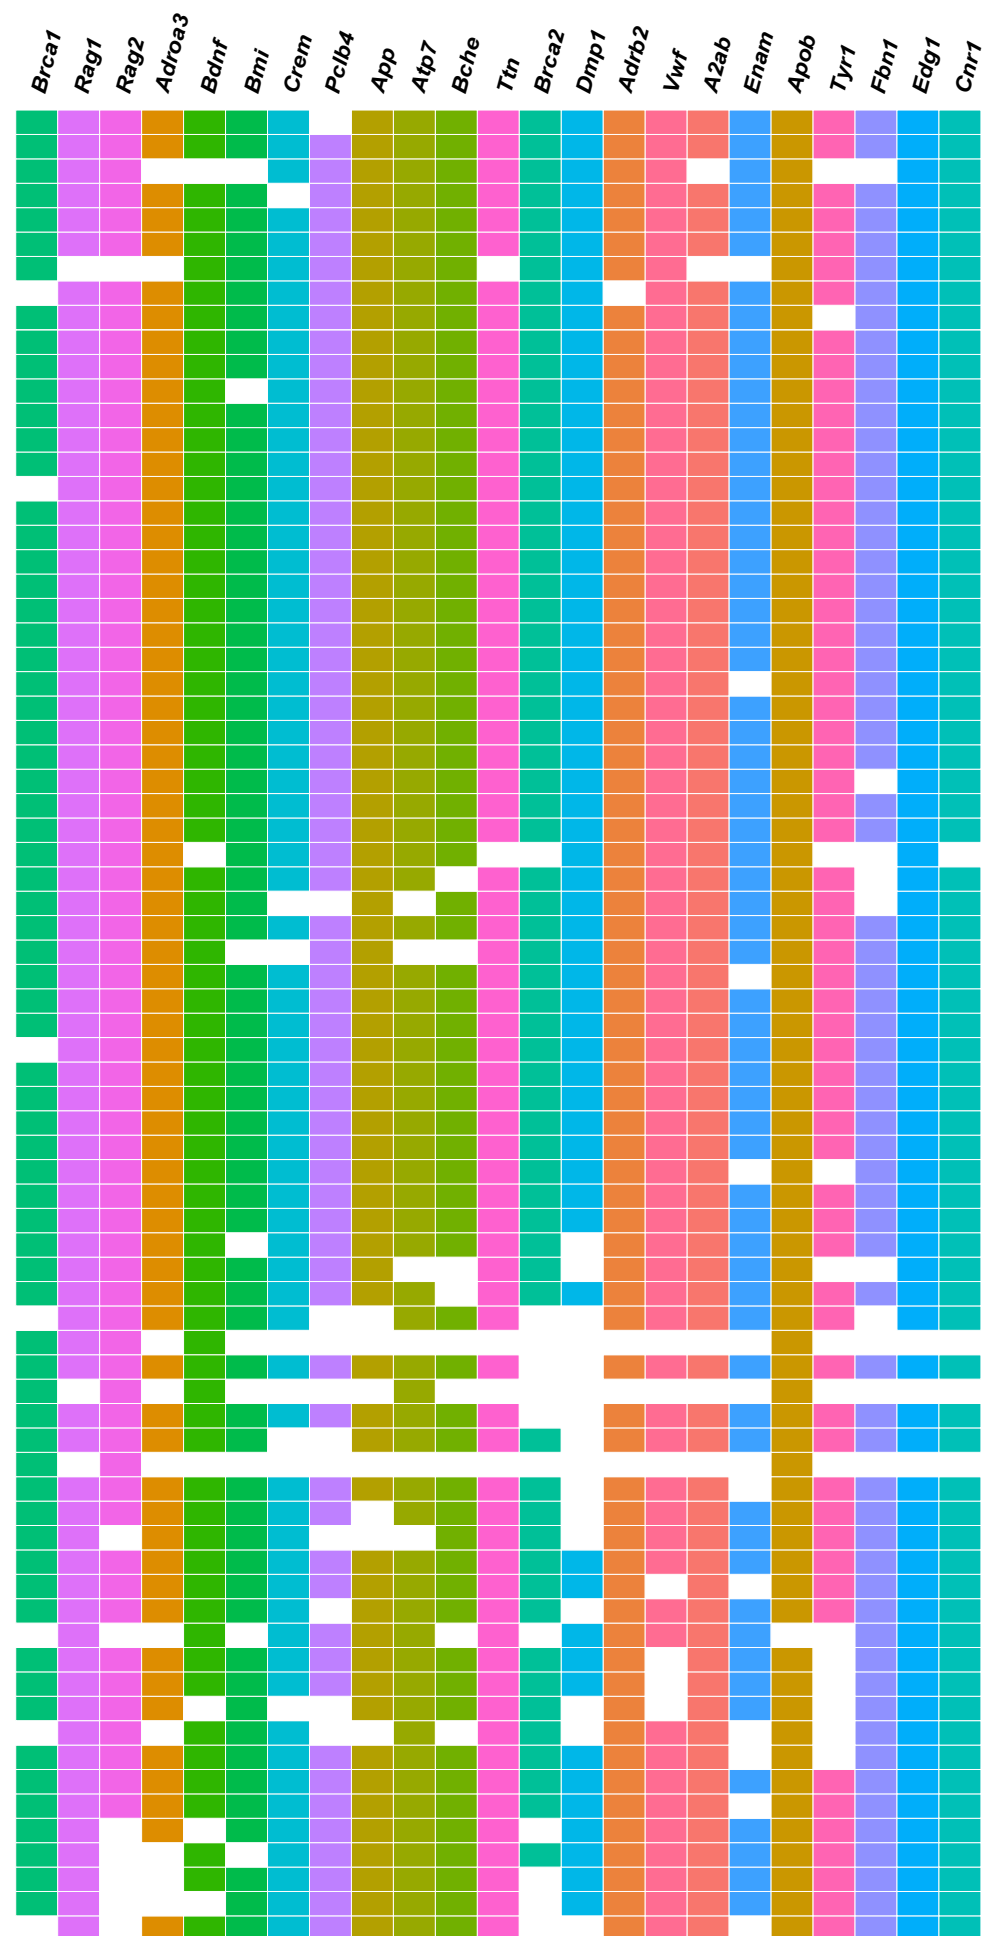

Supplement: supp [file elife_poa_e66797_Figure_2_figure_supplement_1.pdf › elife_poa_e66797_Figure_2_figure_supplement_1.pdf]

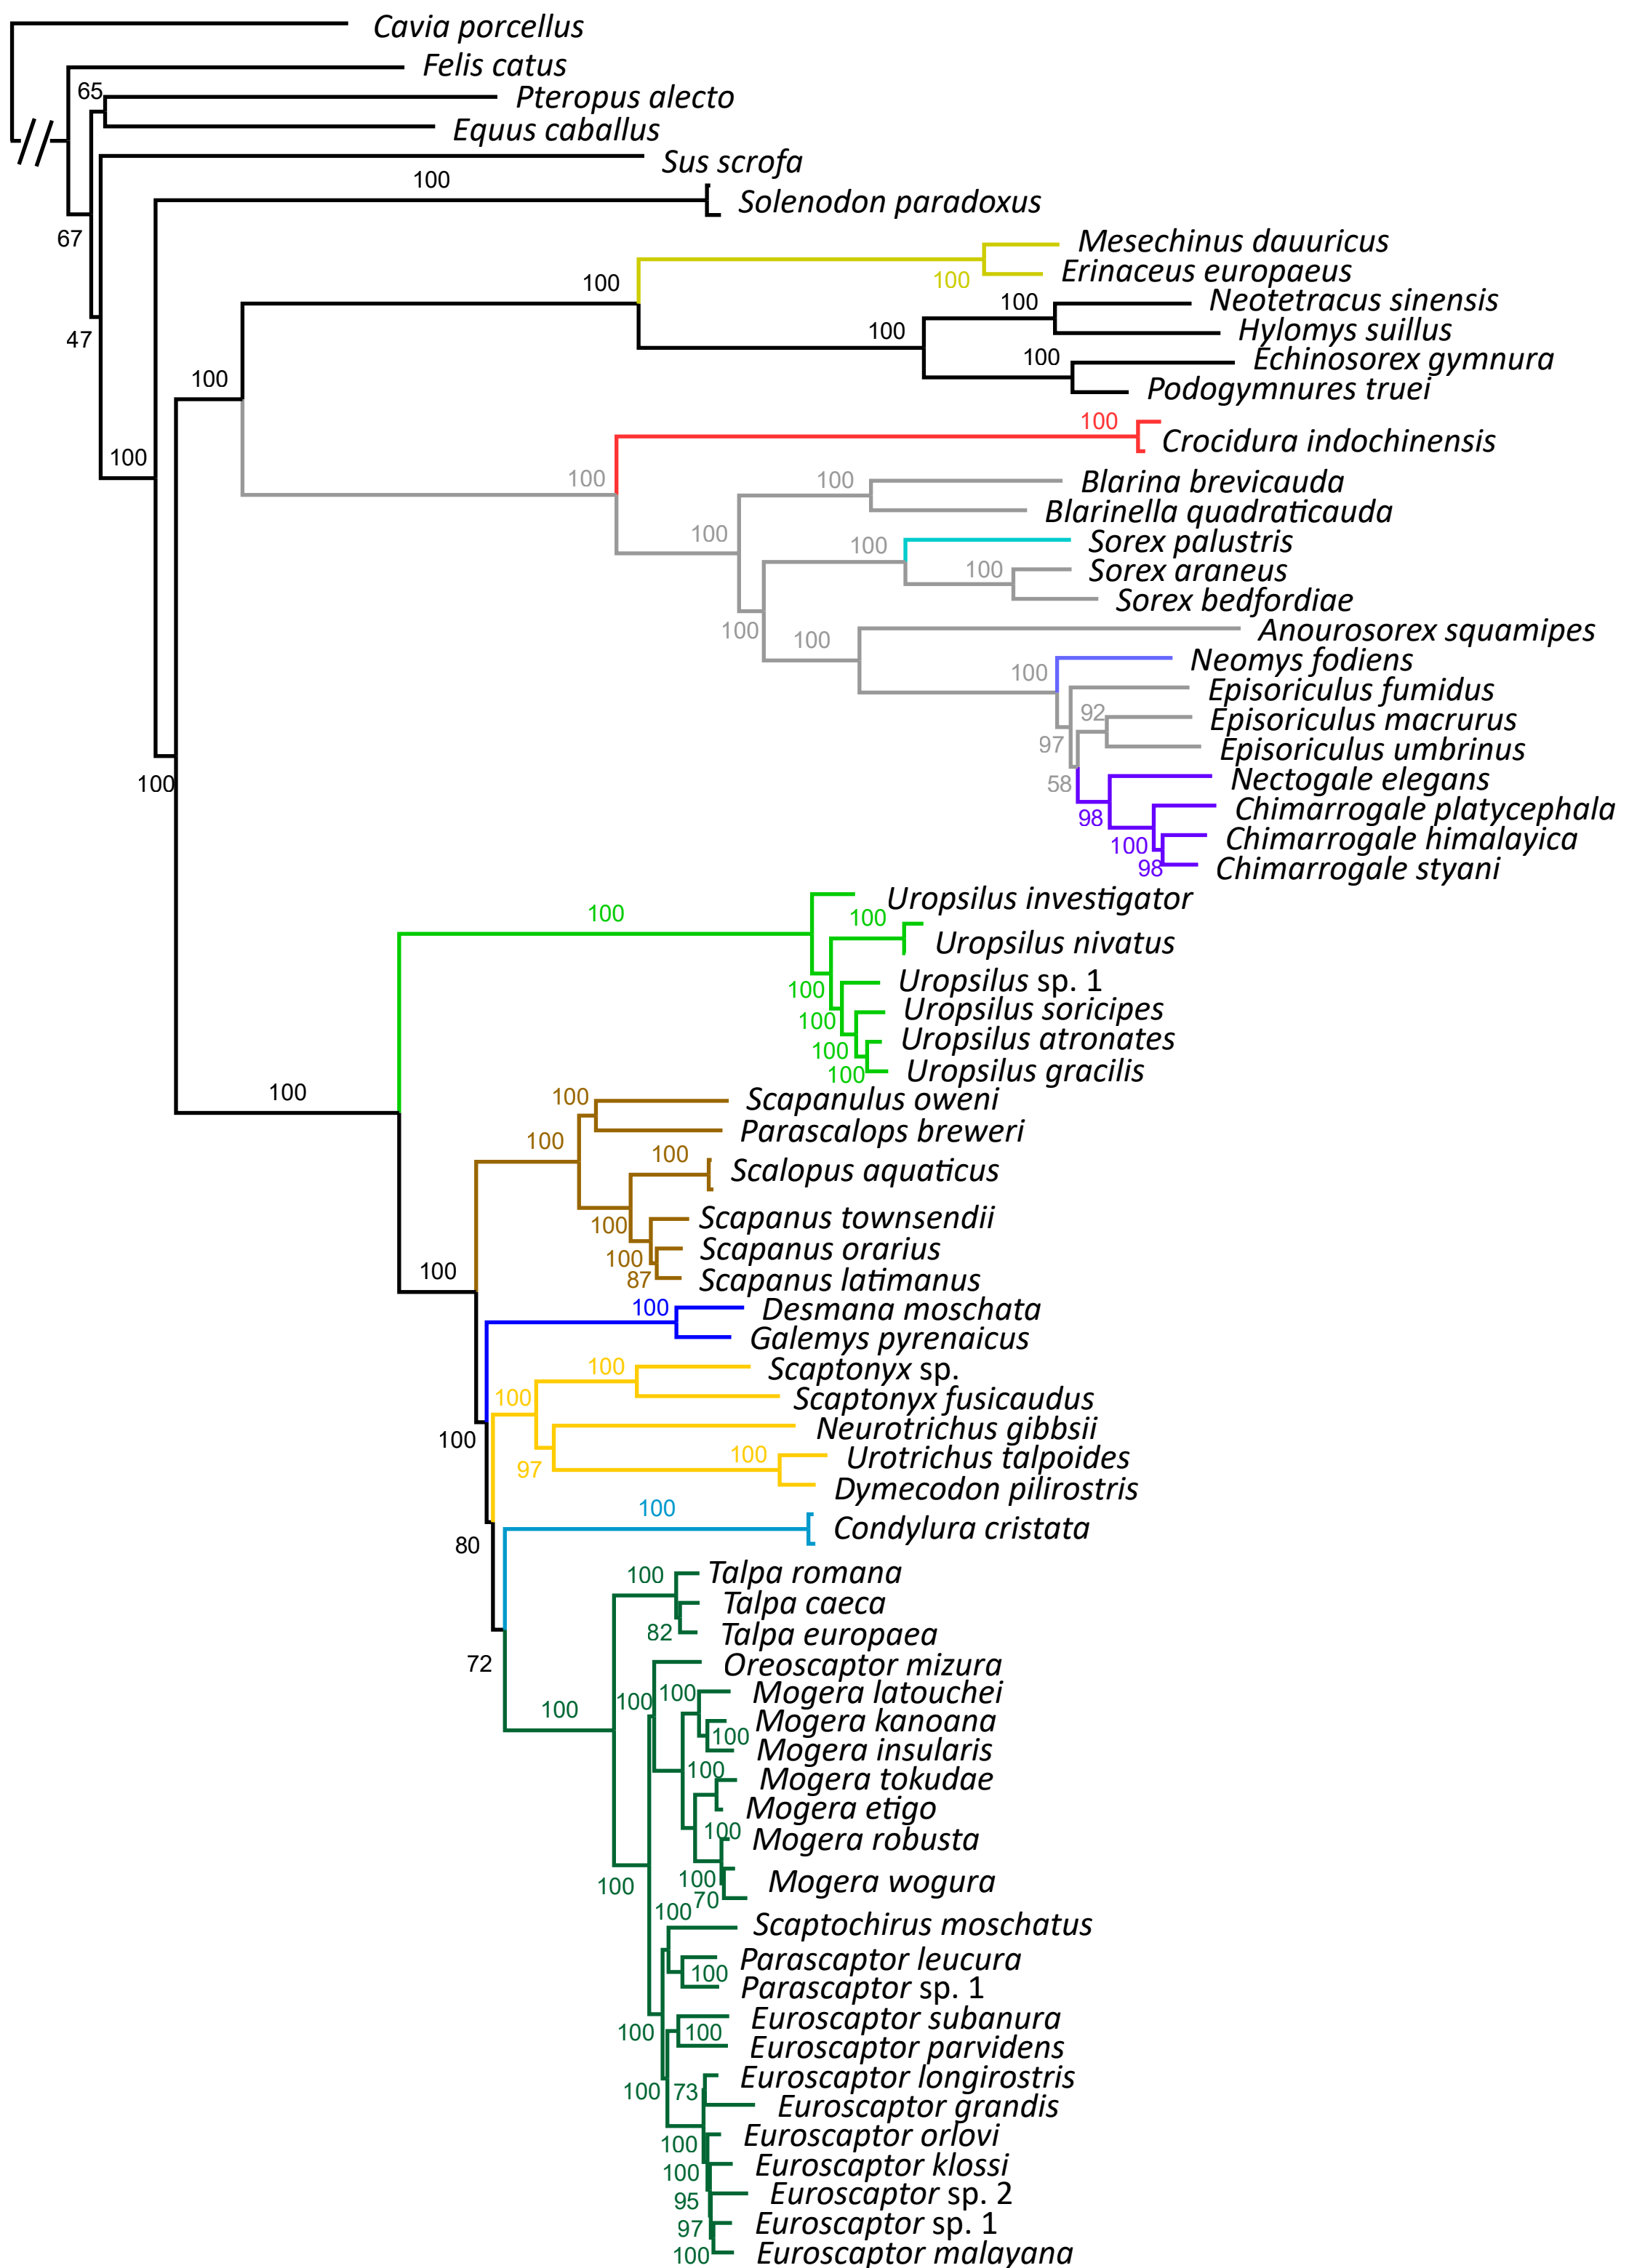

0.04substitutions/site

Supplement: supp [file elife_poa_e66797_Figure_2_figure_supplement_2.pdf › elife_poa_e66797_Figure_2_figure_supplement_2.pdf]

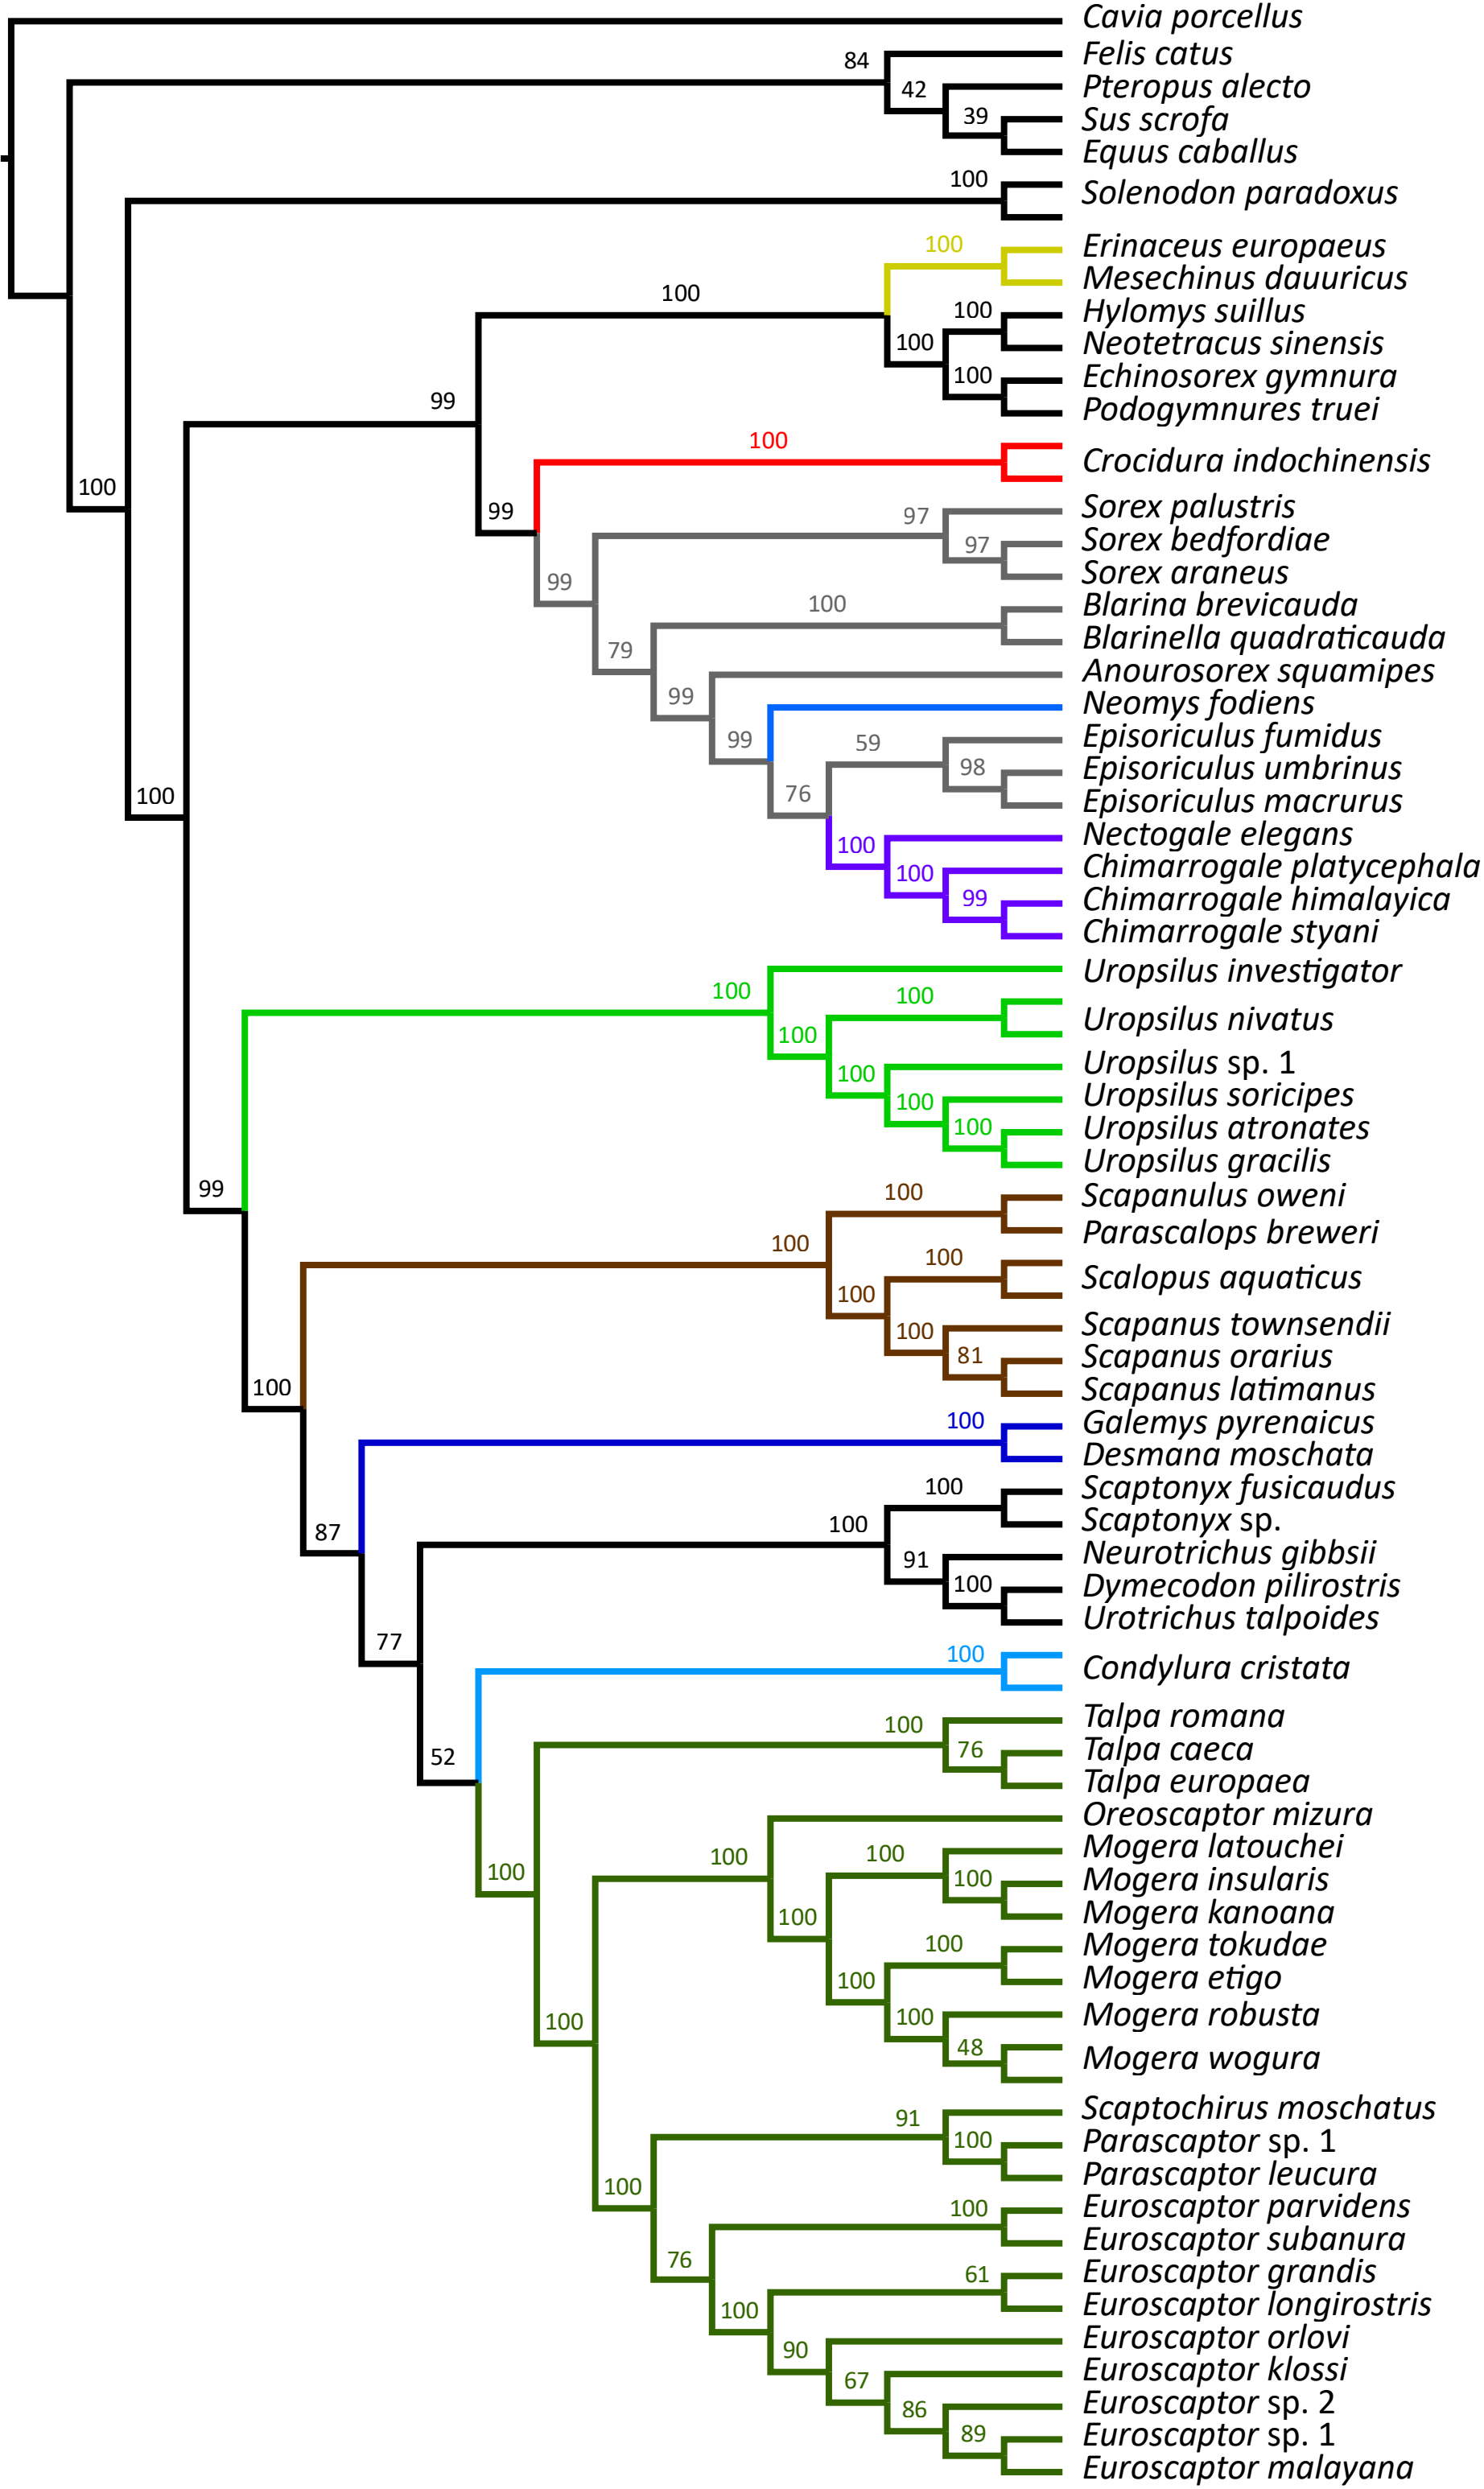

Supplement: supp [file elife_poa_e66797_Figure_2_figure_supplement_3.pdf › elife_poa_e66797_Figure_2_figure_supplement_3.pdf]

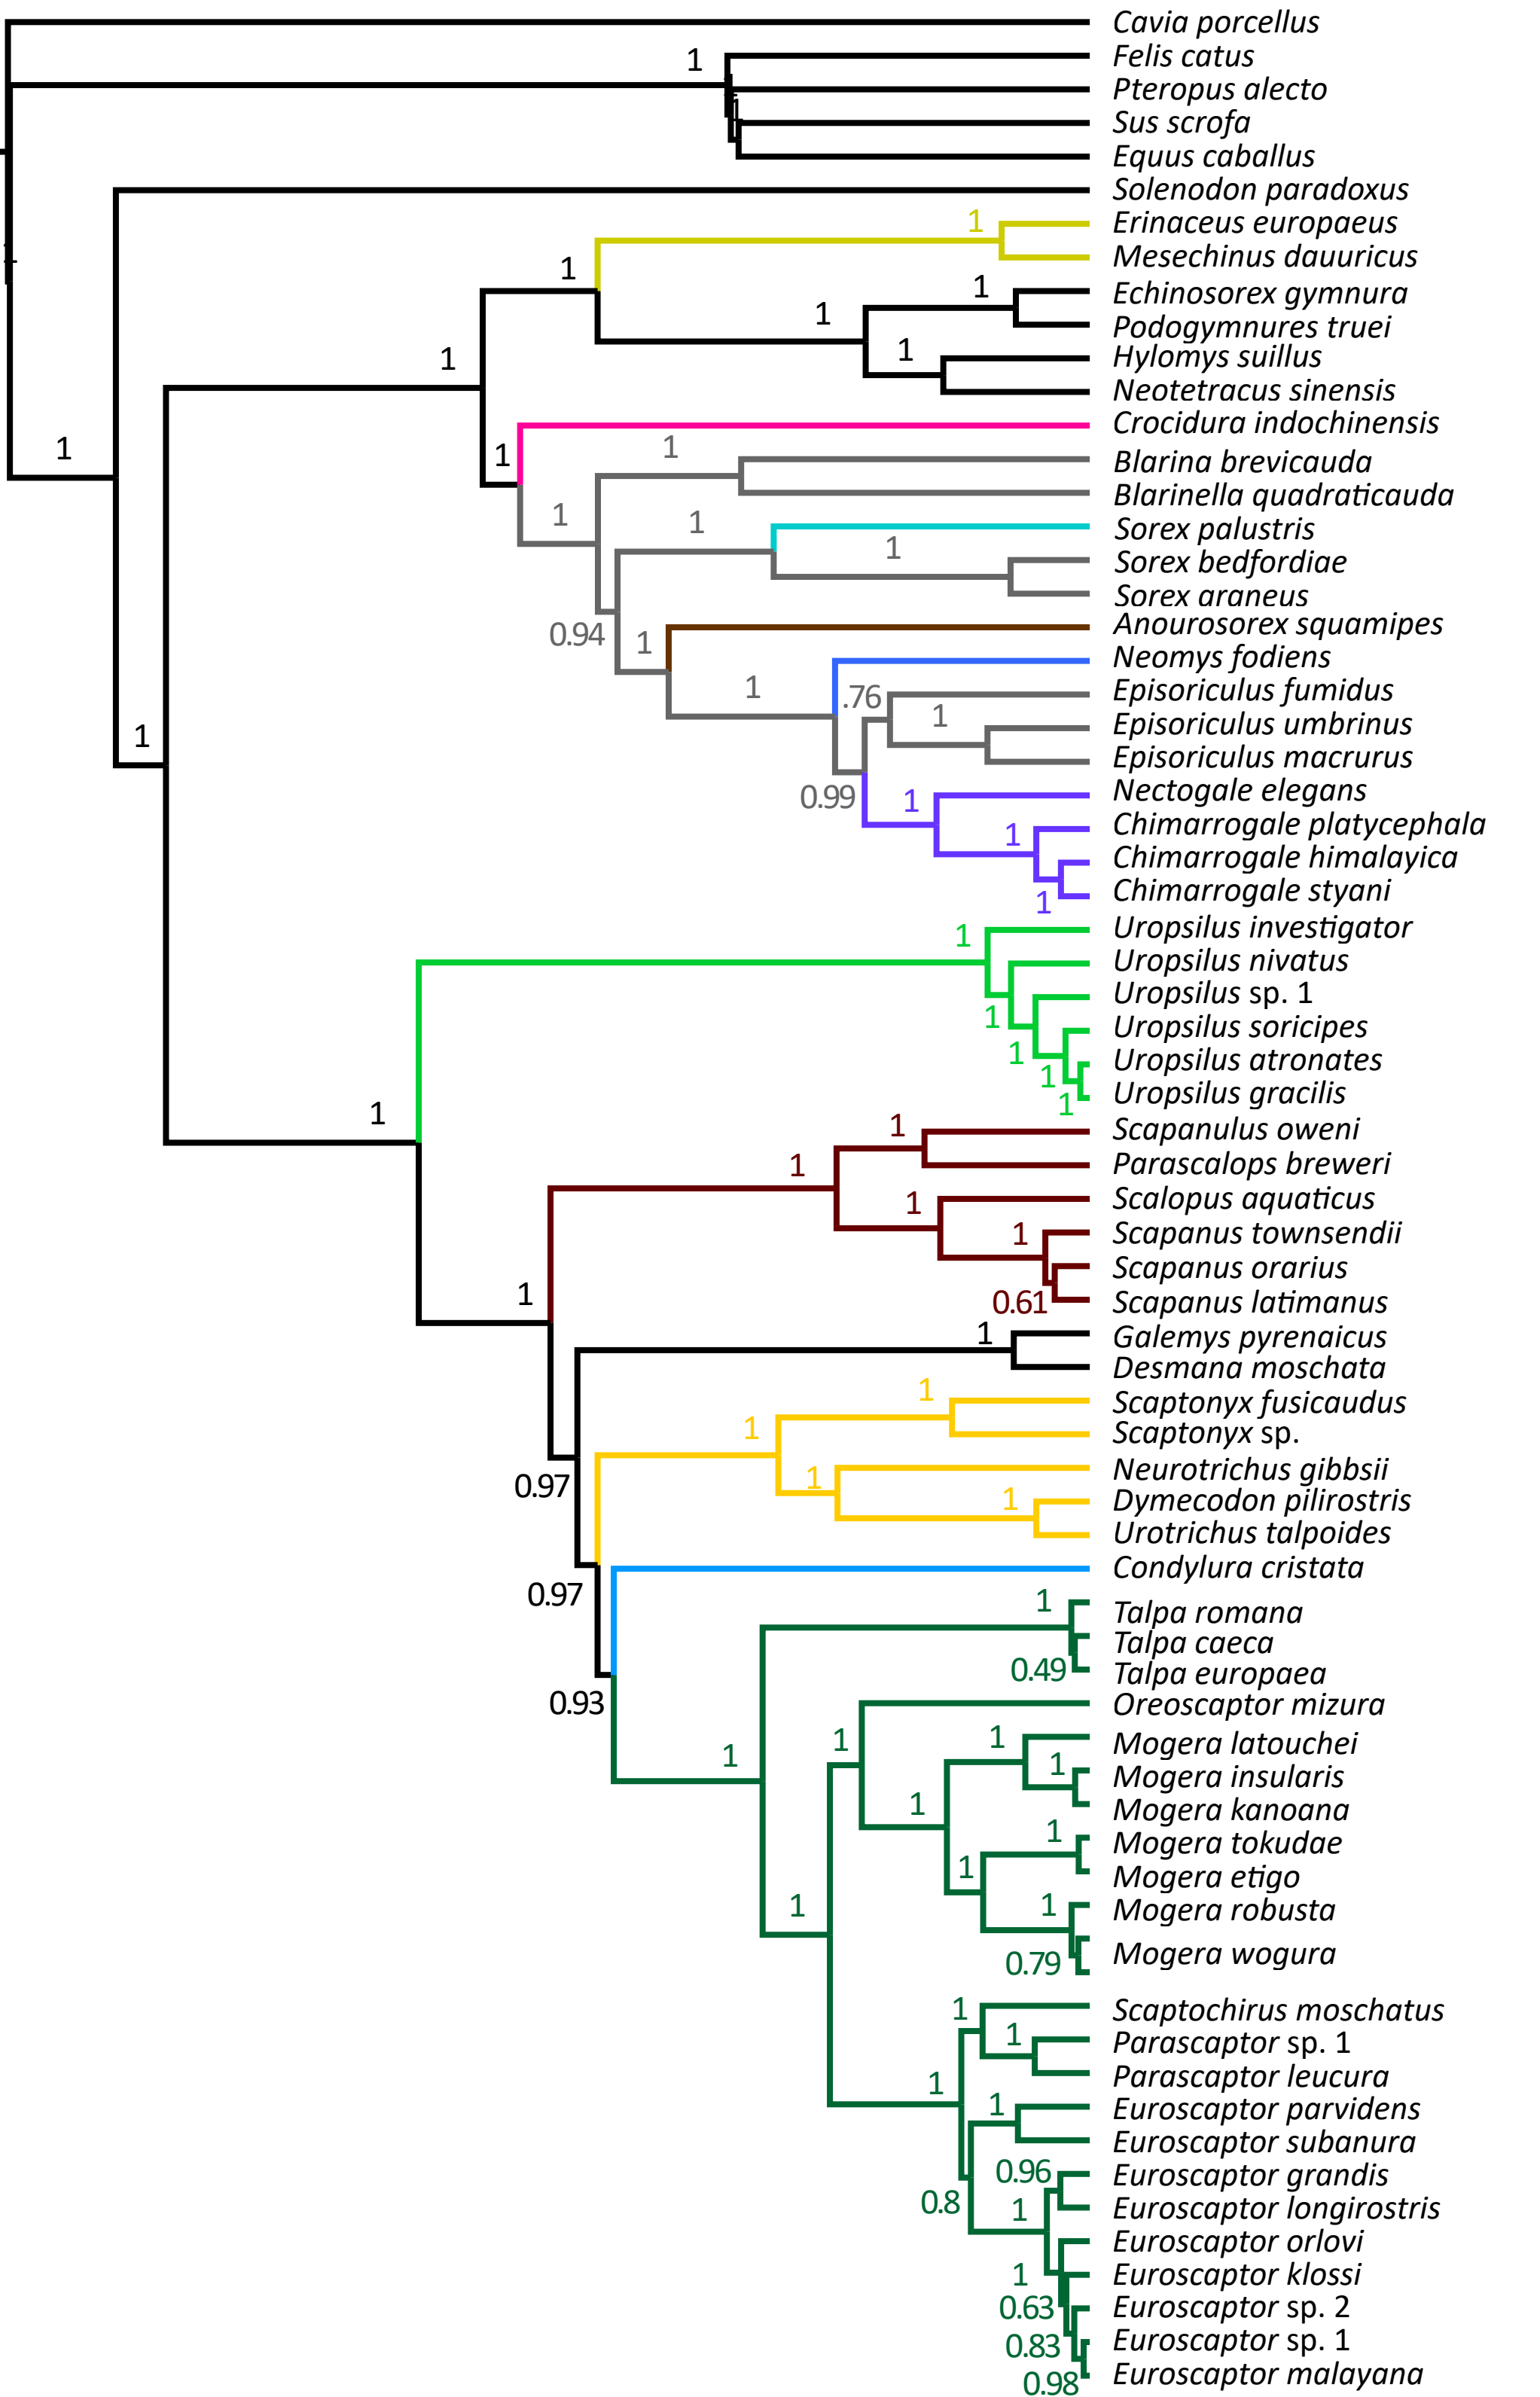

Supplement: supp [file elife_poa_e66797_Figure_2_figure_supplement_4.pdf › elife_poa_e66797_Figure_2_figure_supplement_4.pdf]

**A**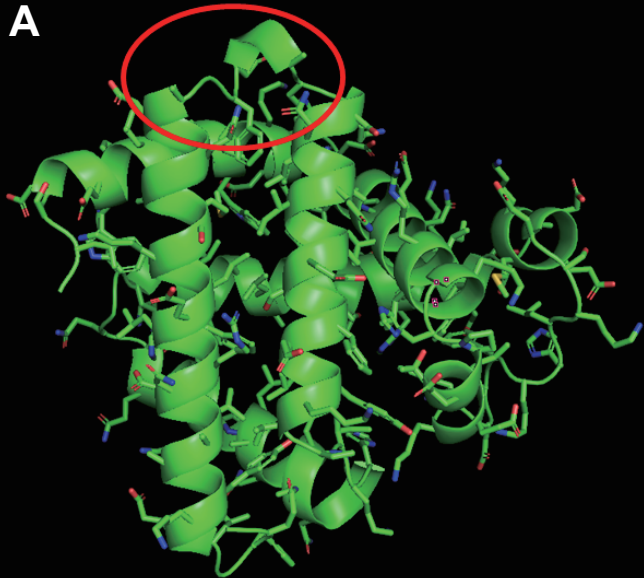**B**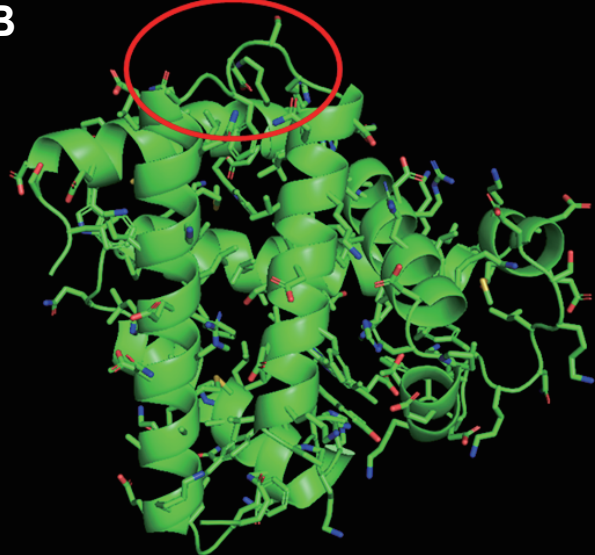

Supplement: supp [file elife_poa_e66797_Figure_3_figure_supplement_1.pdf › elife_poa_e66797_Figure_3_figure_supplement_1.pdf]

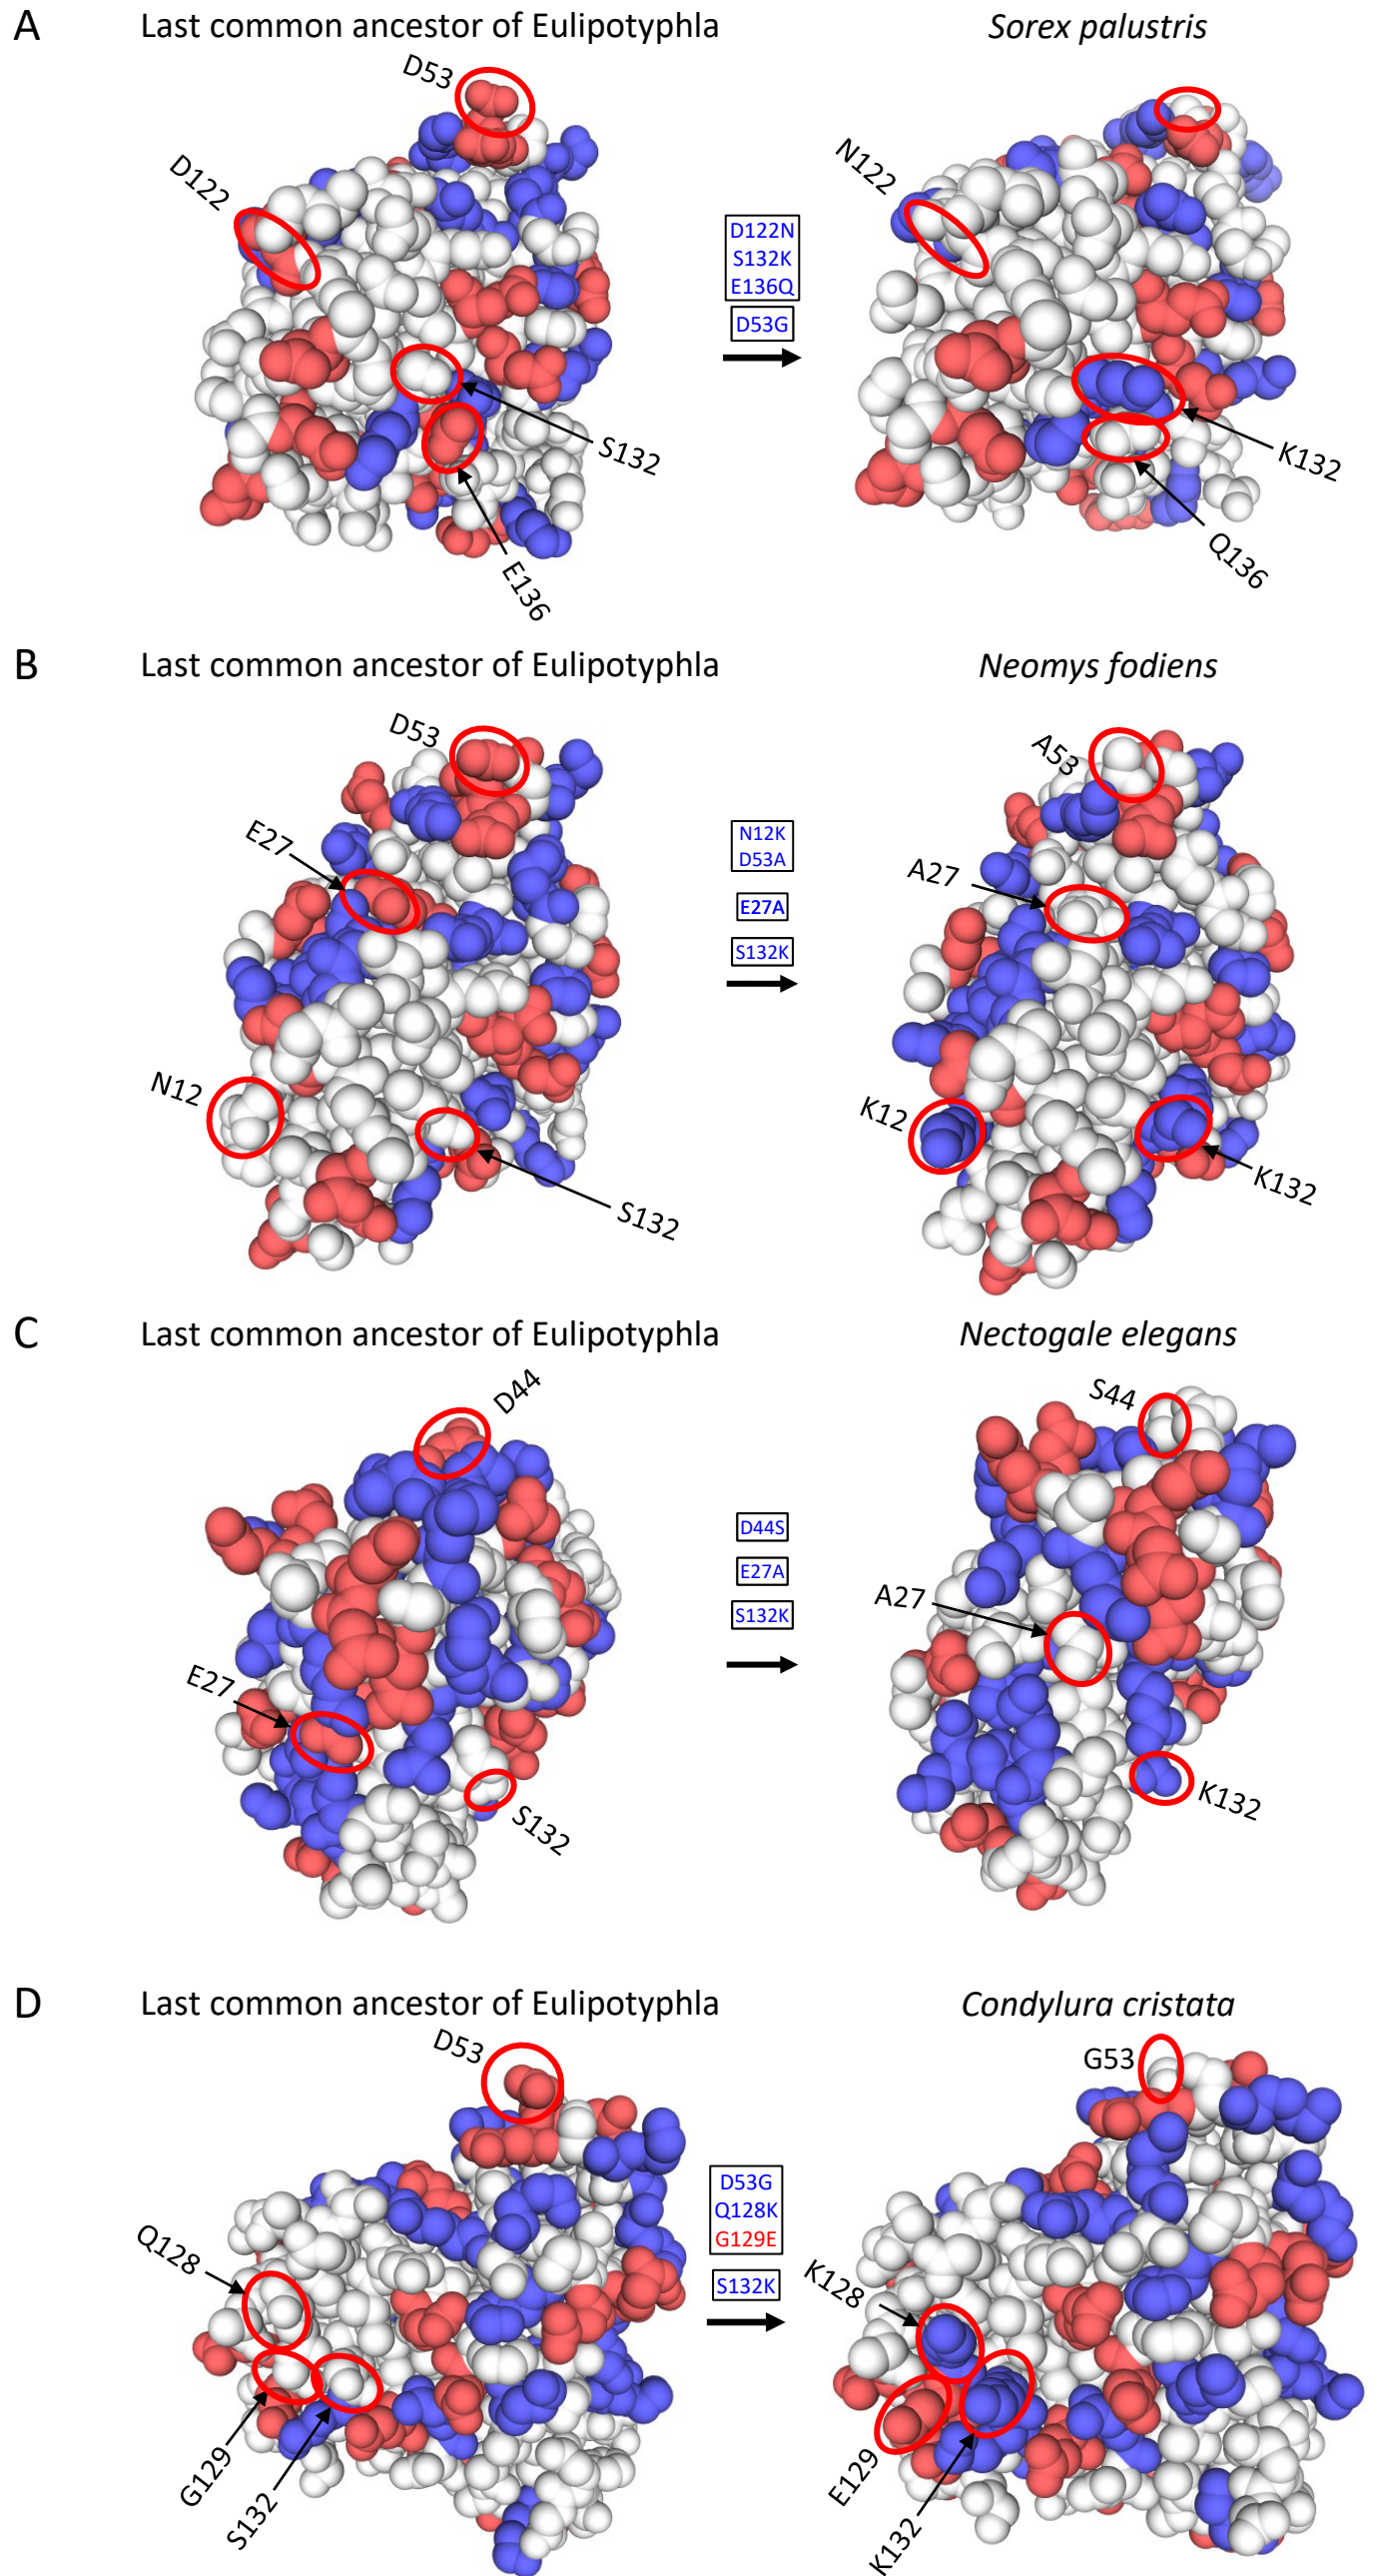

Supplement: supp [file elife_poa_e66797_Figure_3_figure_supplement_2.pdf › elife_poa_e66797_Figure_3_figure_supplement_2.pdf]

# habitat

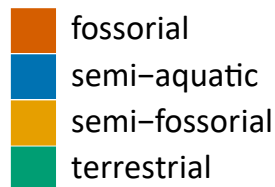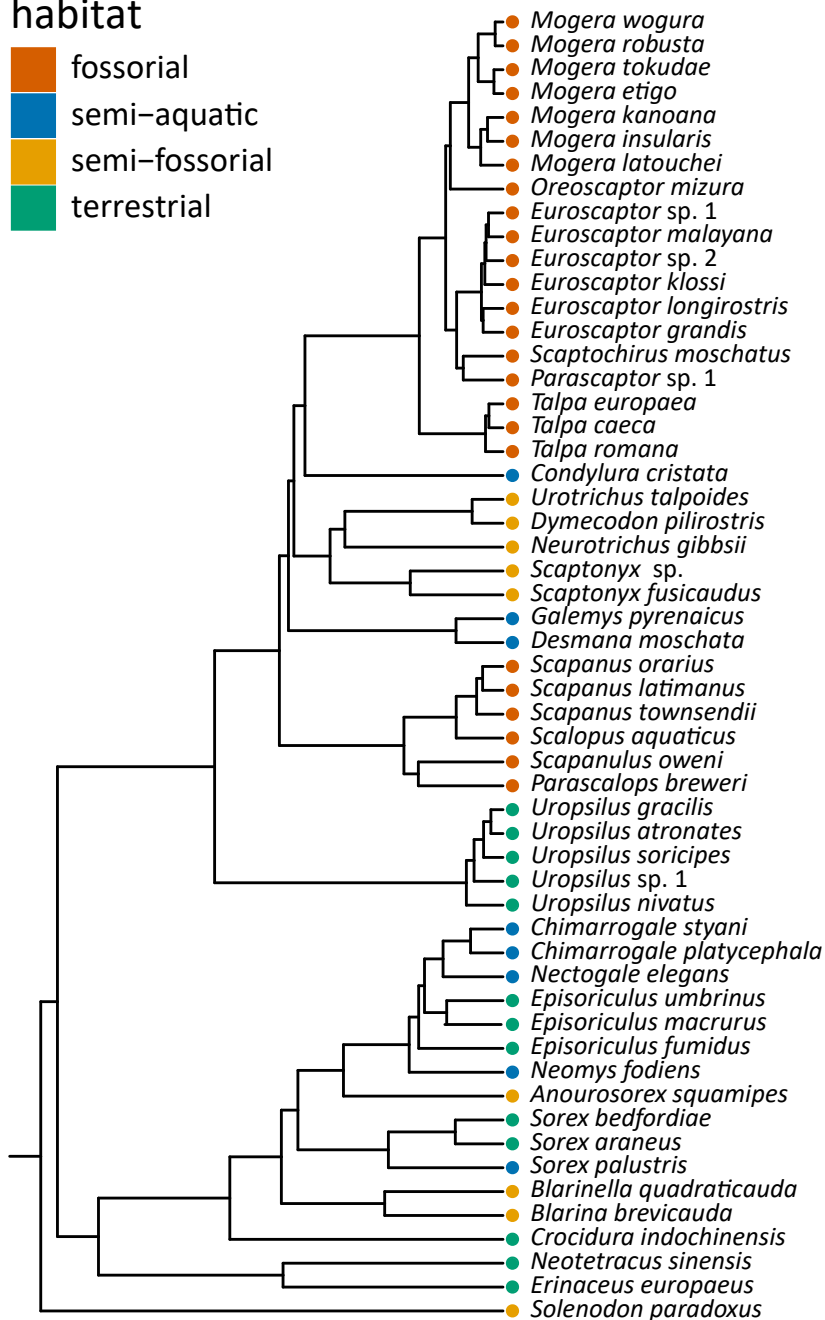

Z Mb

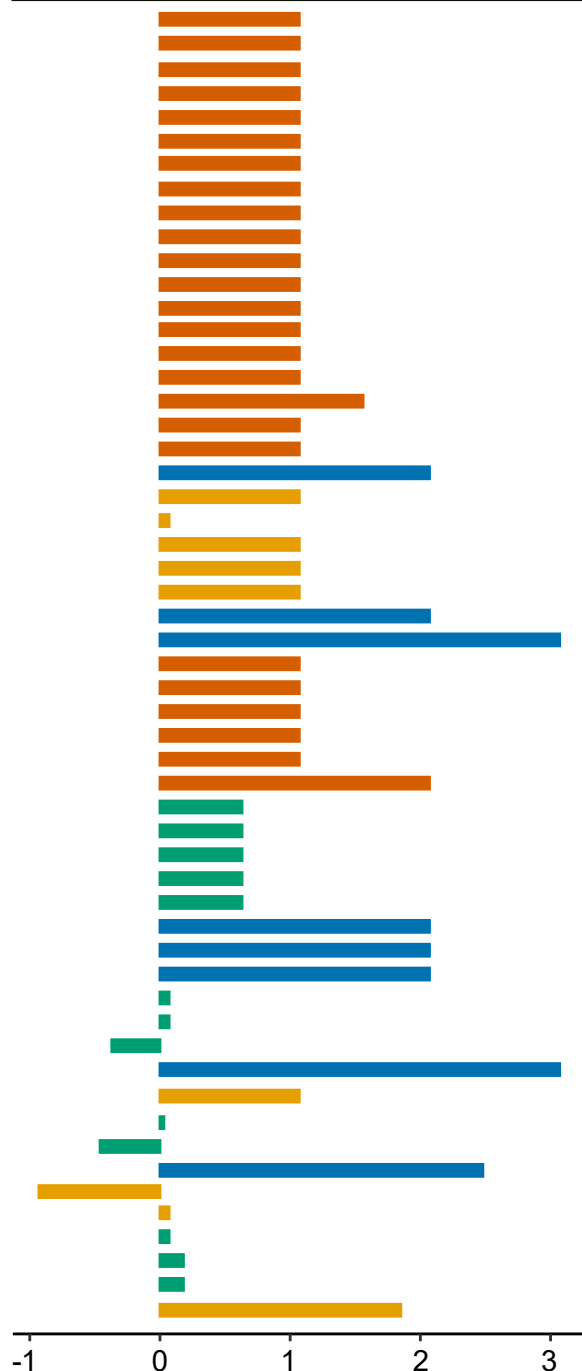

Supplement: supp [file elife_poa_e66797_Figure_4_figure_supplement_1.pdf › elife_poa_e66797_Figure_4_figure_supplement_1.pdf]

A)

TOL

Myoglobin DNA

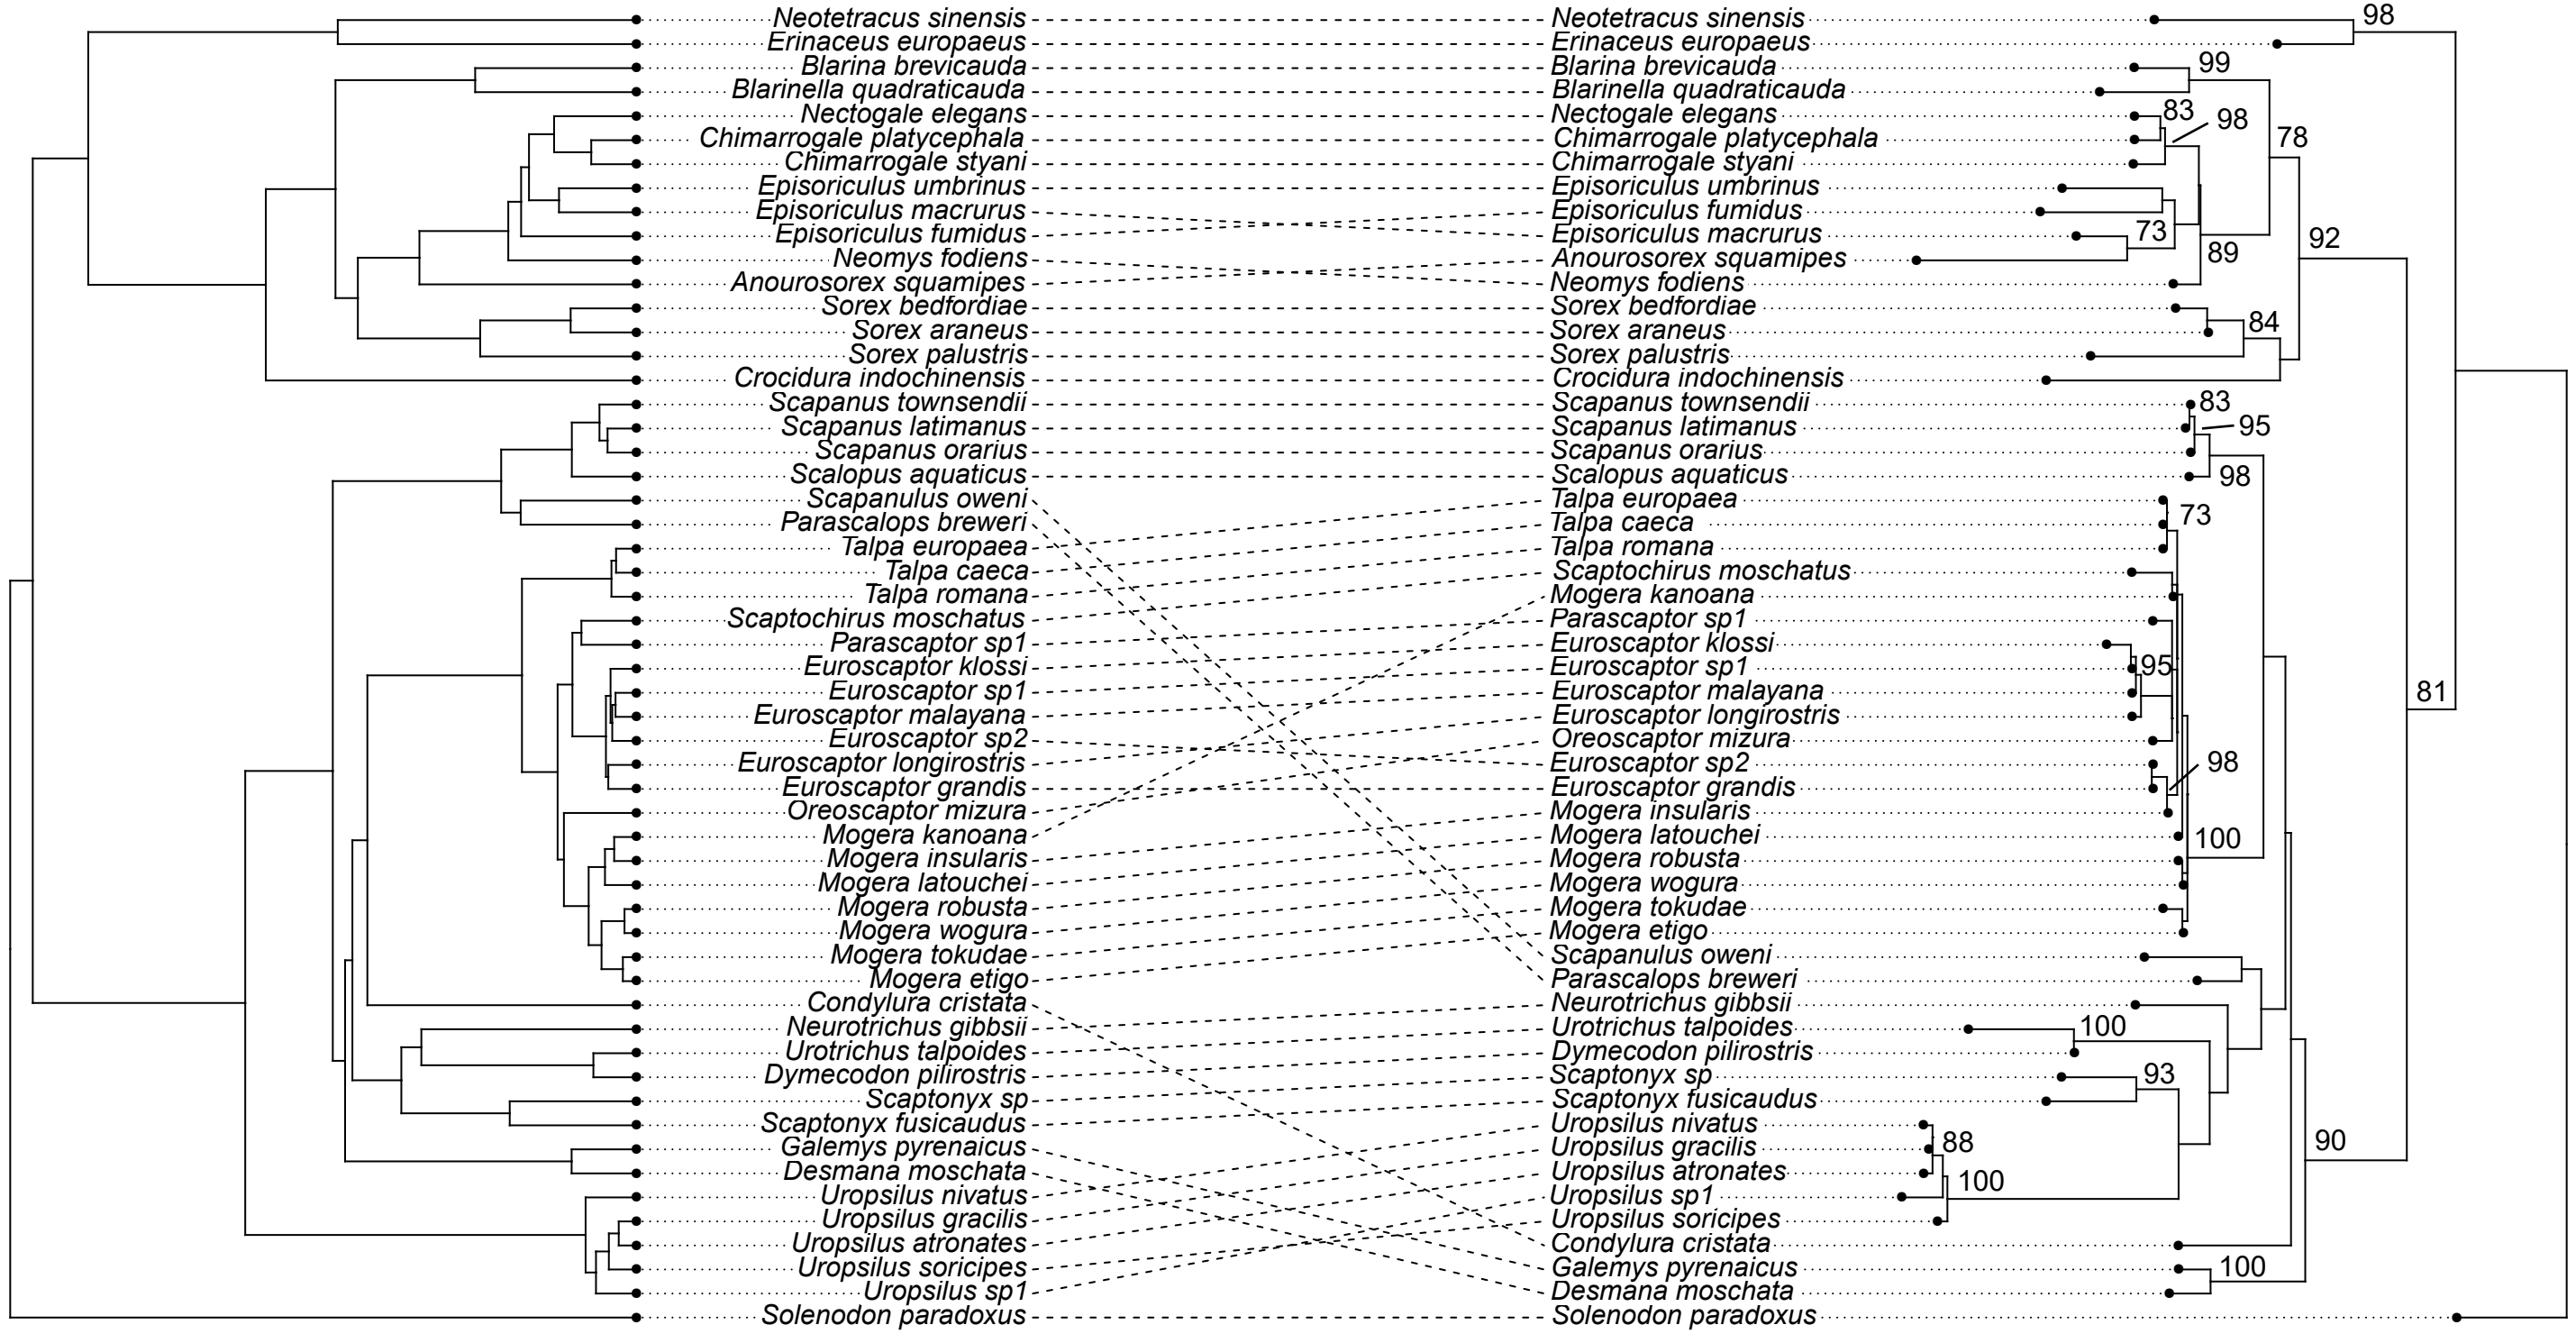

0.05substitutions/site

Supplement: supp [file elife_poa_e66797_Figure_4_figure_supplement_2a.pdf › elife_poa_e66797_Figure_4_figure_supplement_2a.pdf]

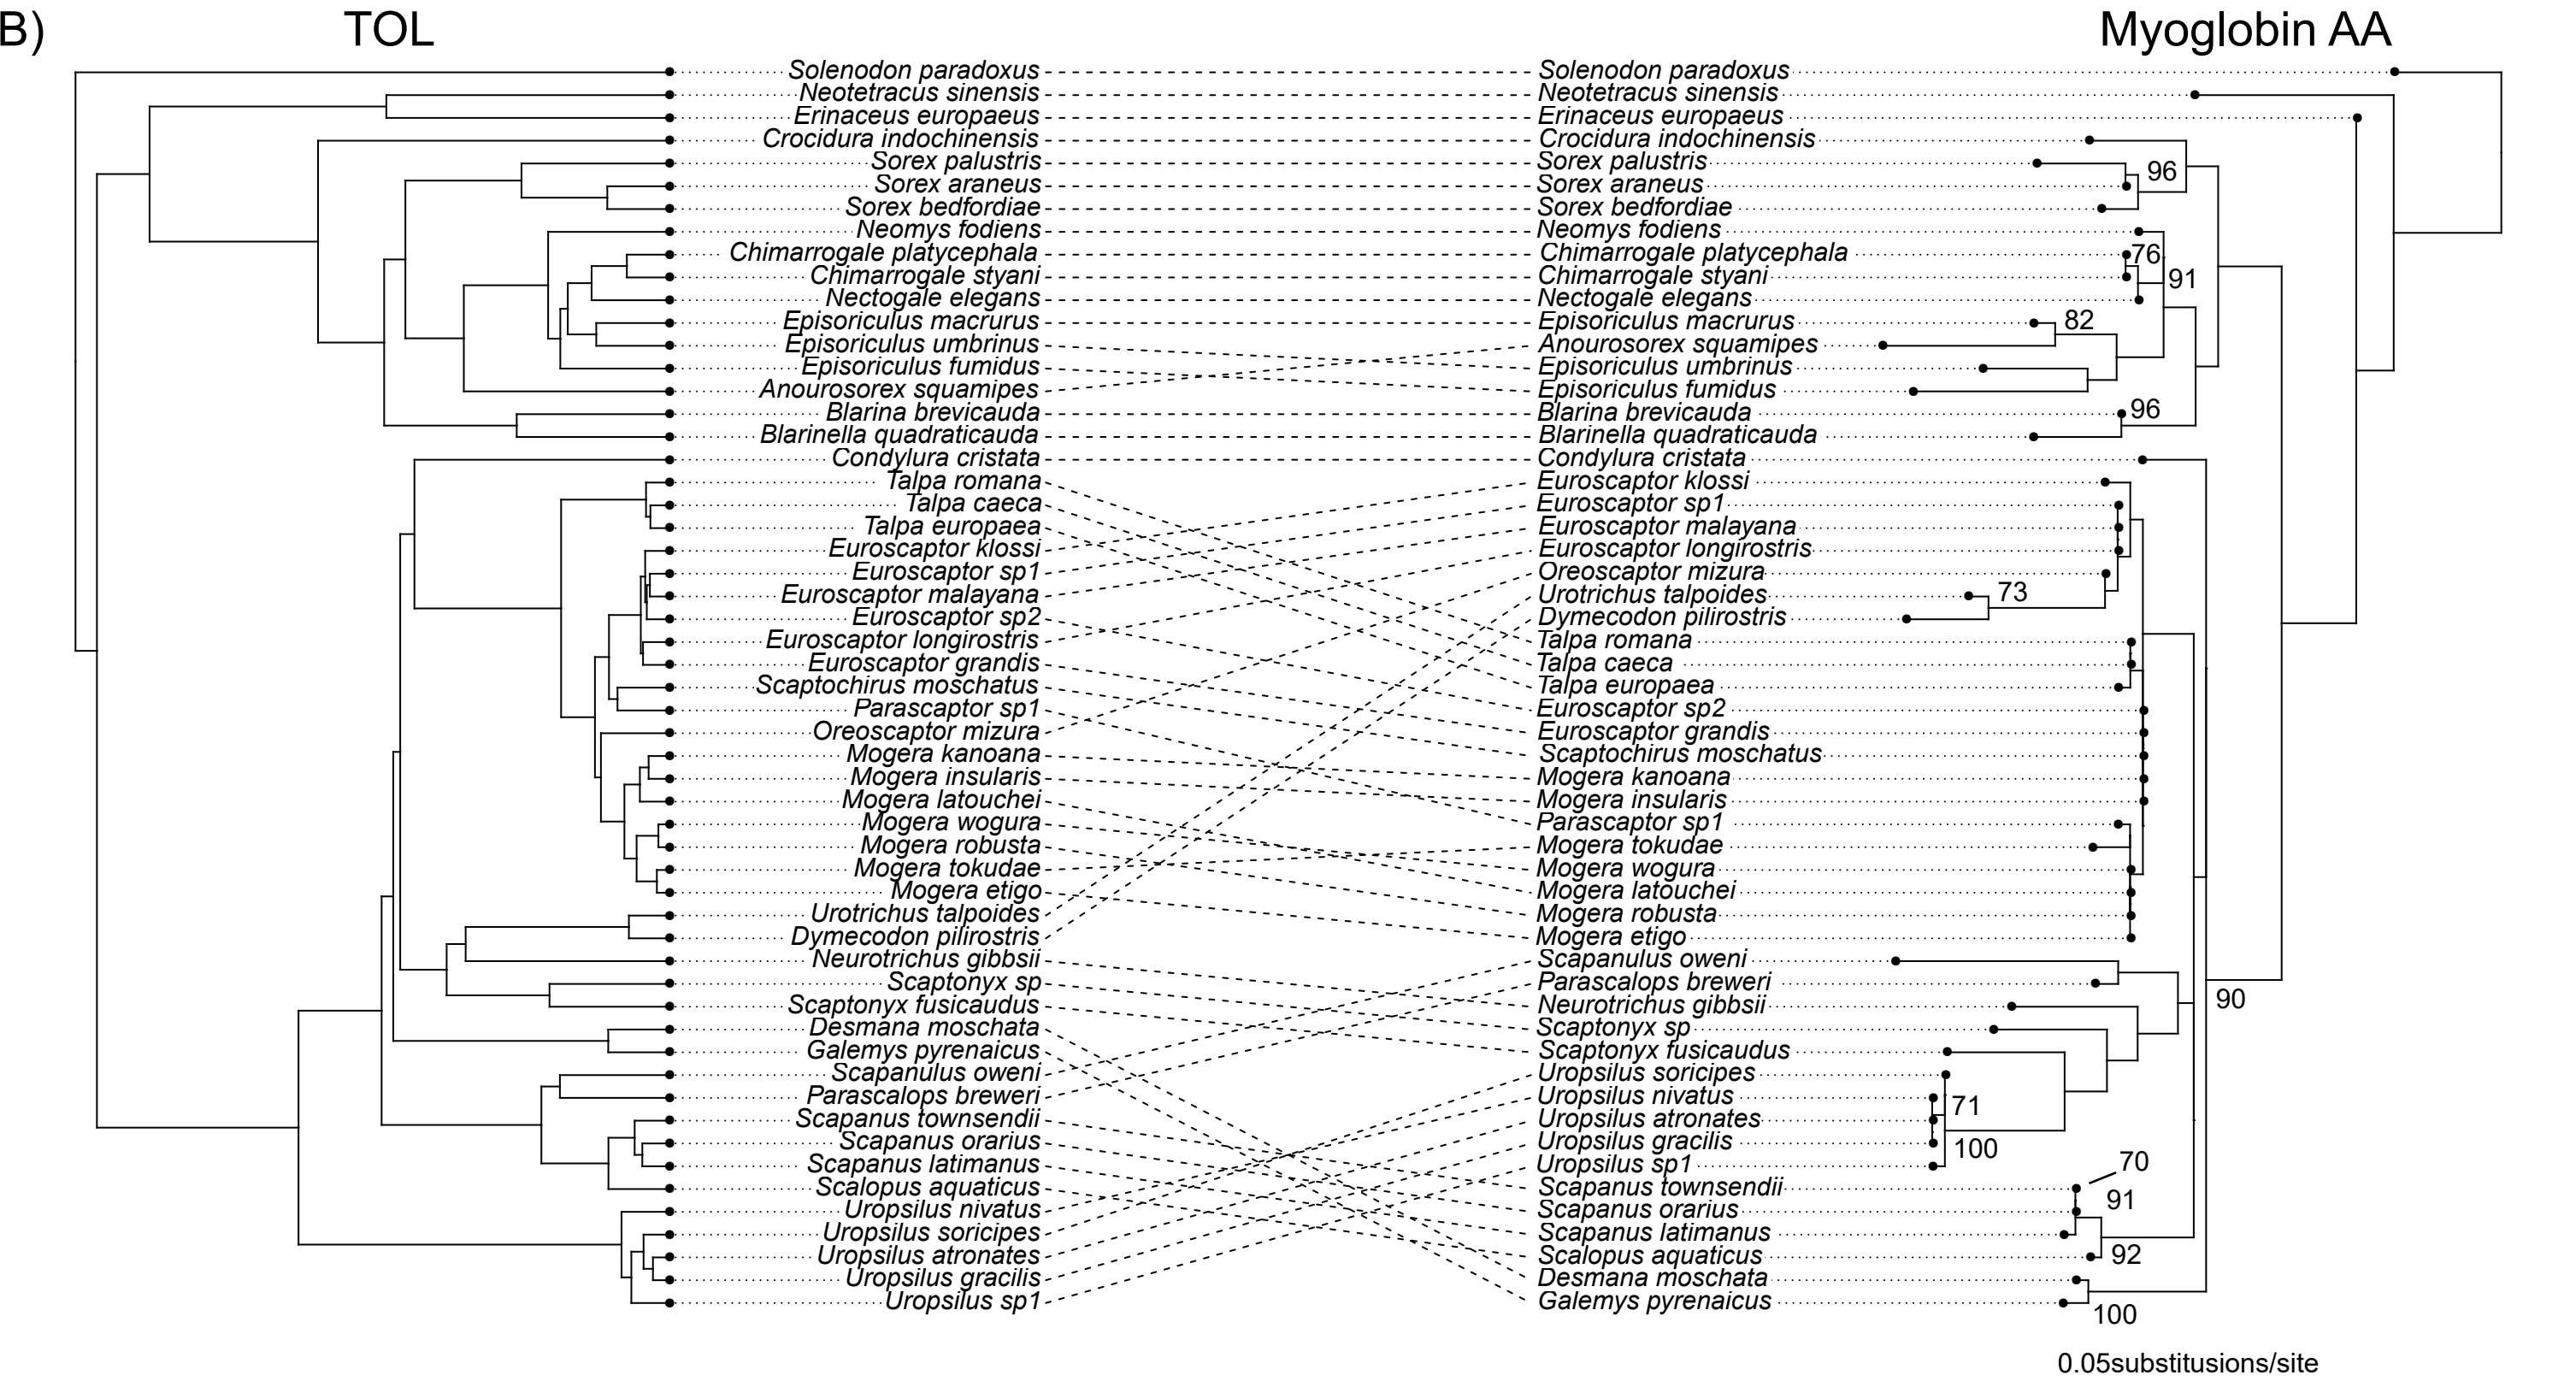

Supplement: supp [file elife_poa_e66797_Figure_4_figure_supplement_2b.pdf › elife_poa_e66797_Figure_4_figure_supplement_2b.pdf]

A

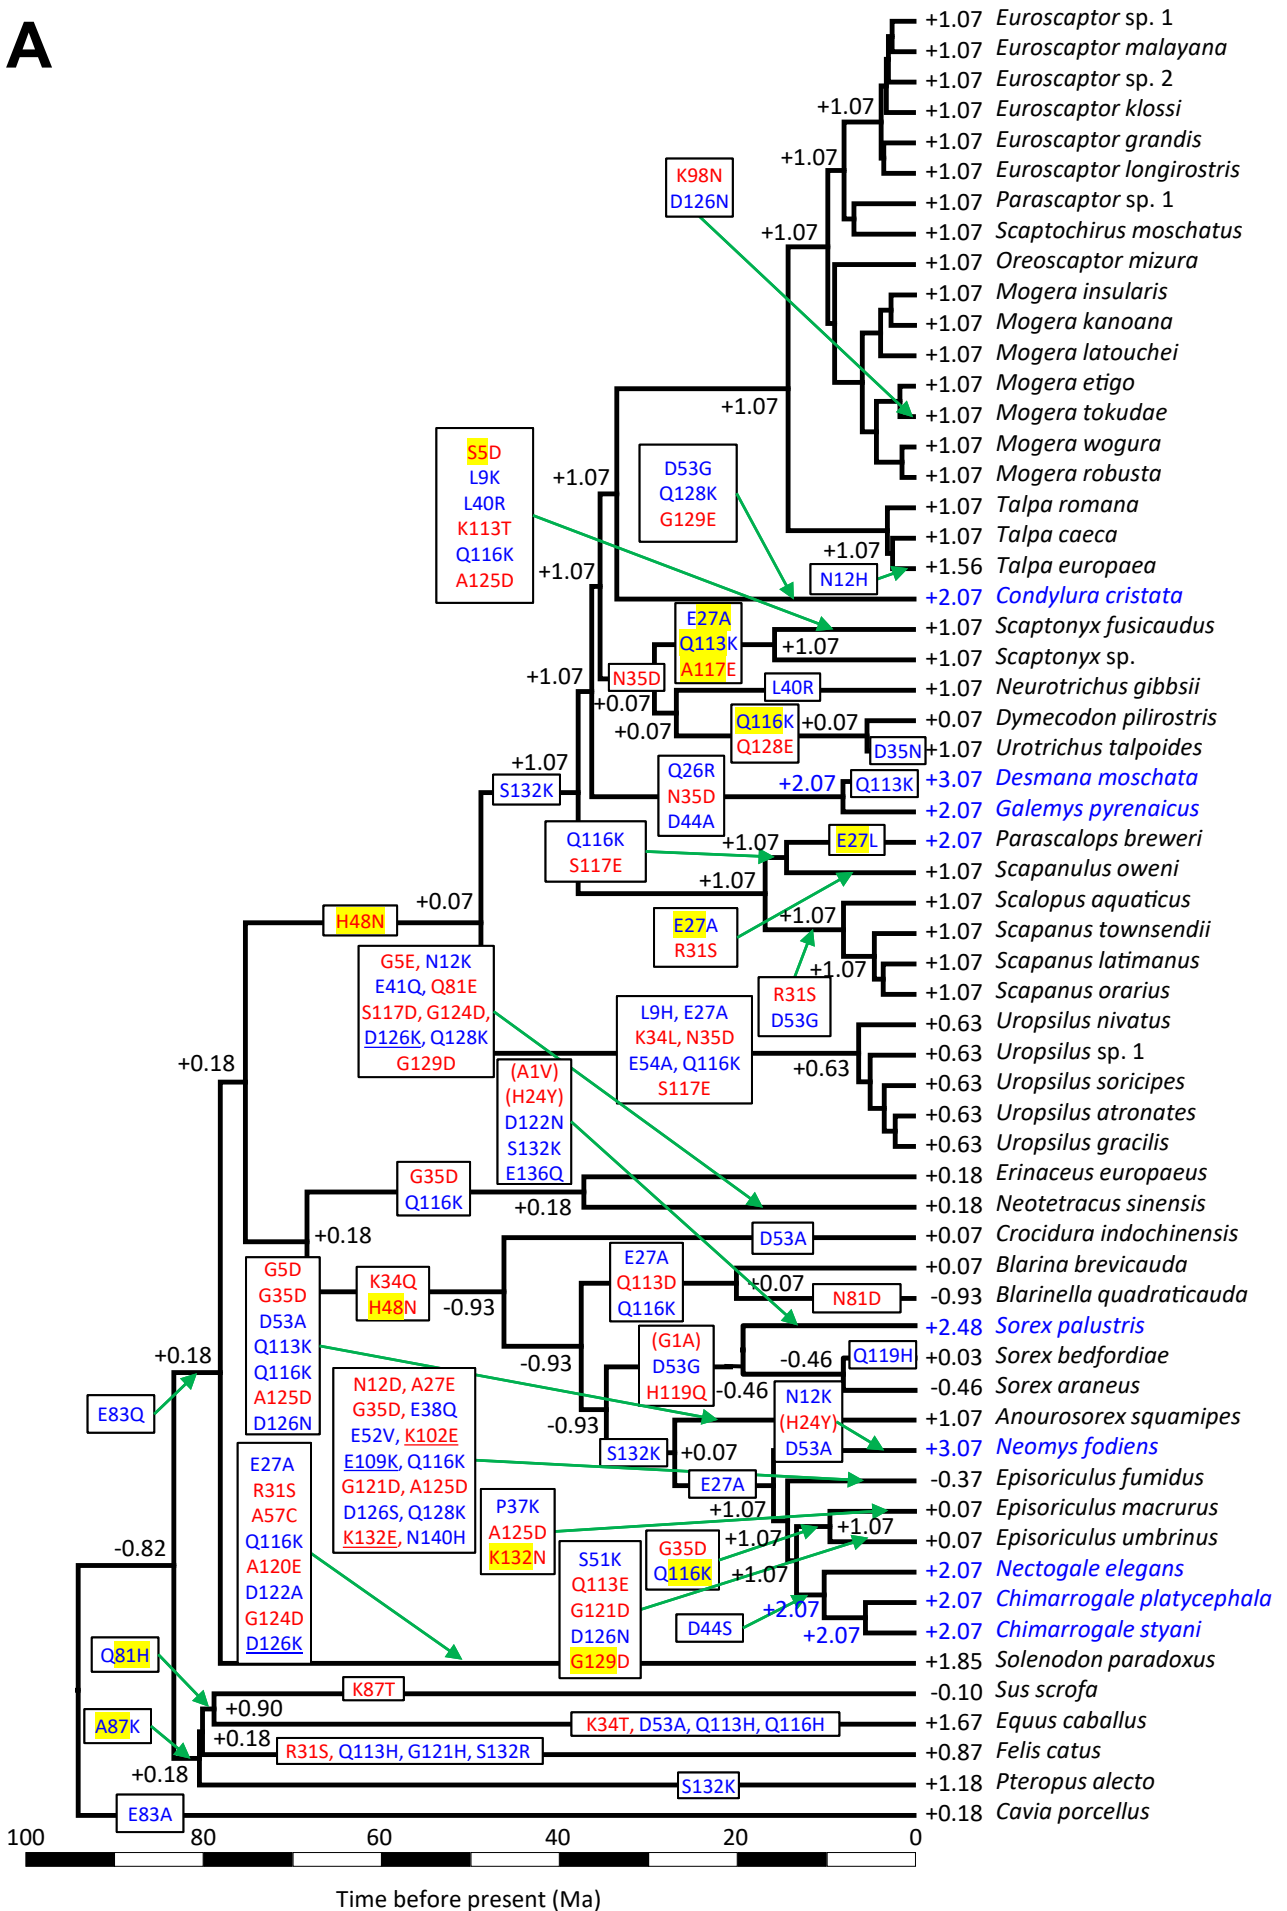

B

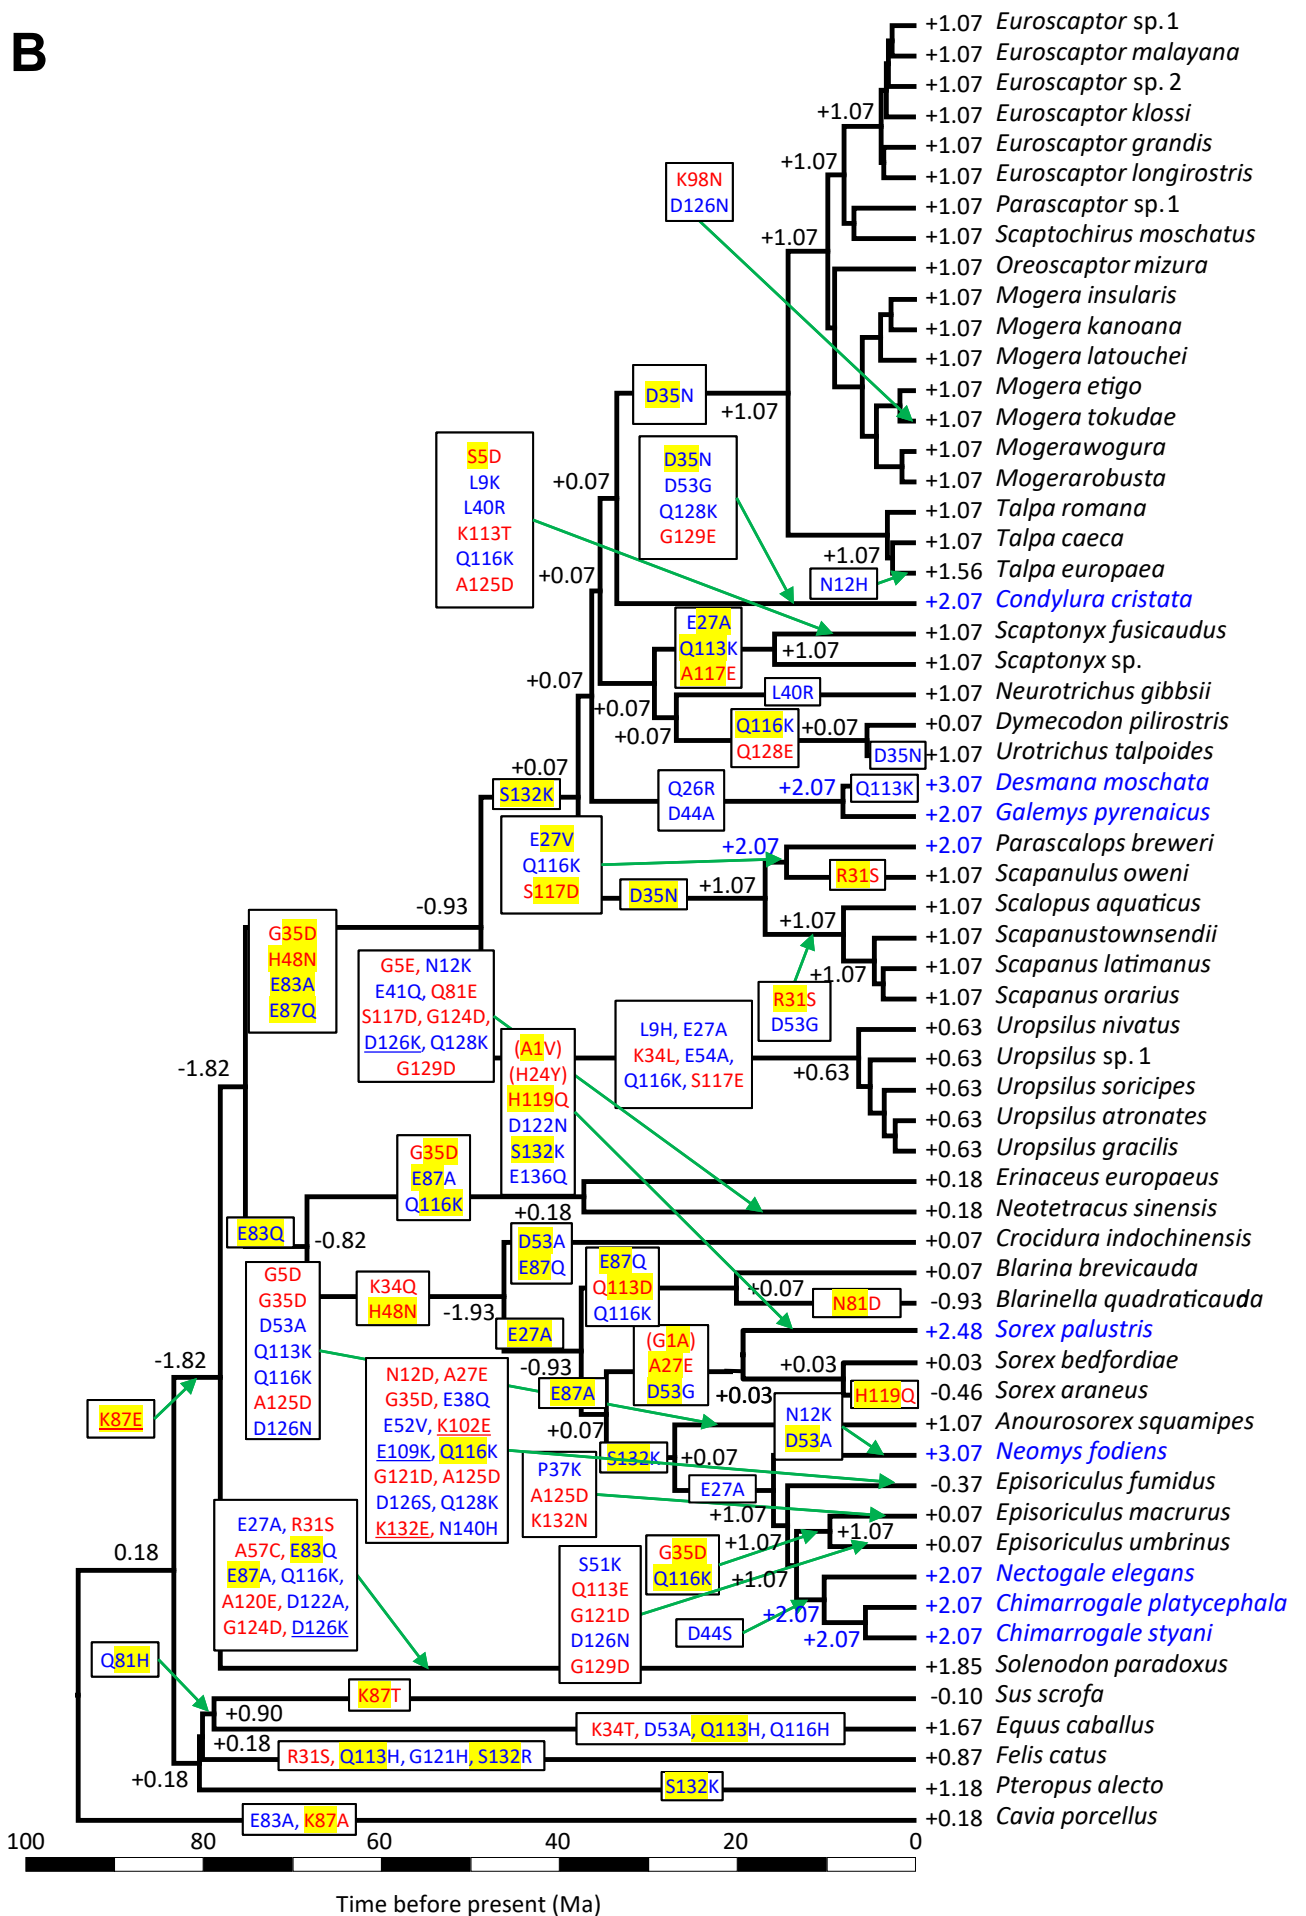

C

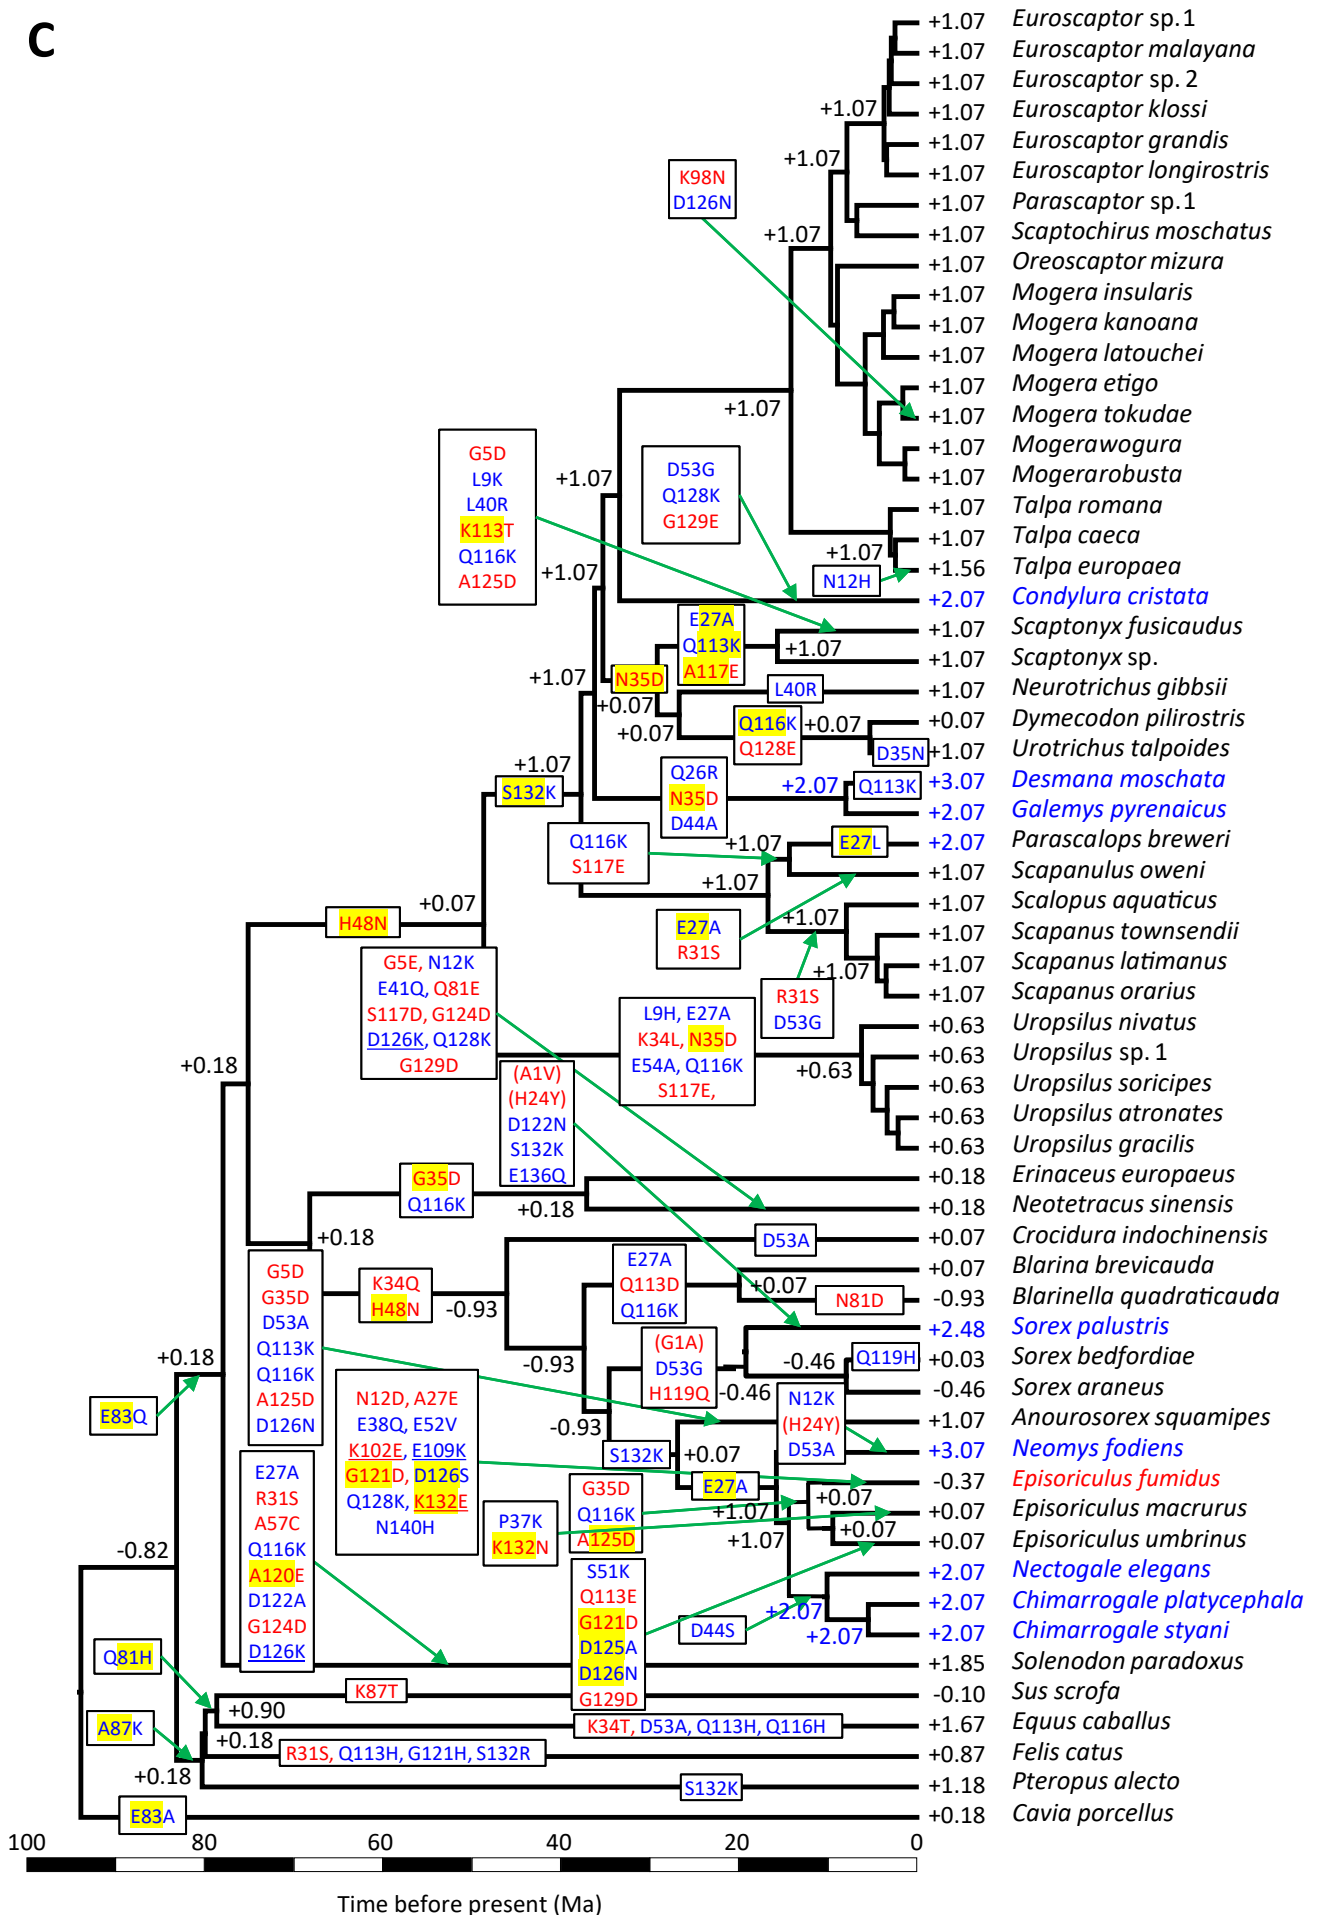

Supplement: supp [file elife_poa_e66797_Figure_5_figure_supplement_1.pdf › elife_poa_e66797_Figure_5_figure_supplement_1.pdf]

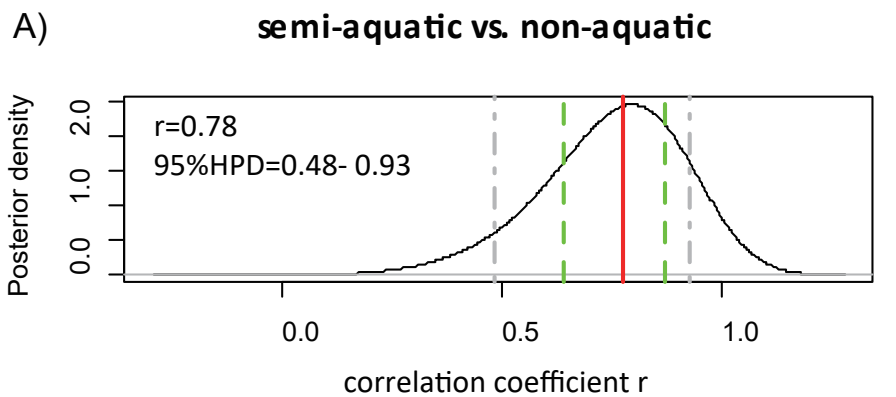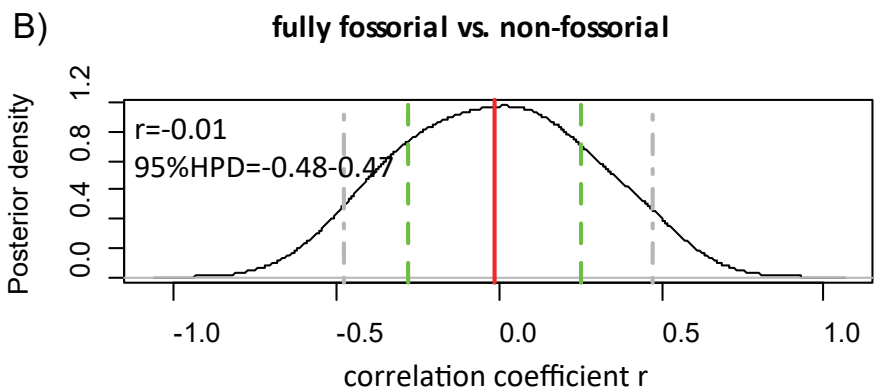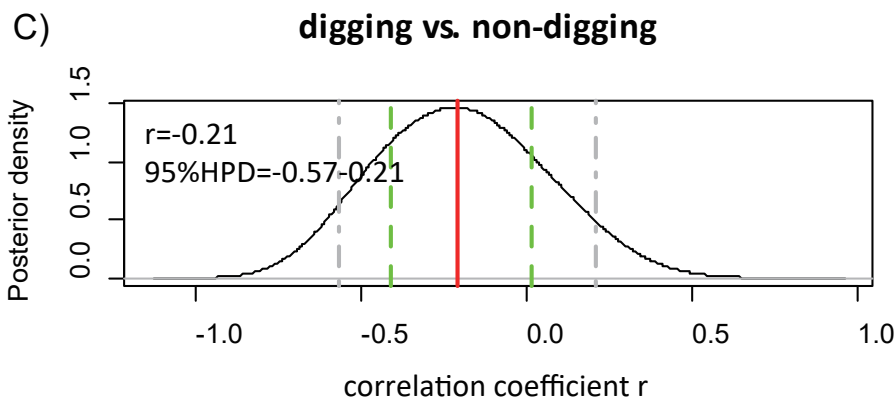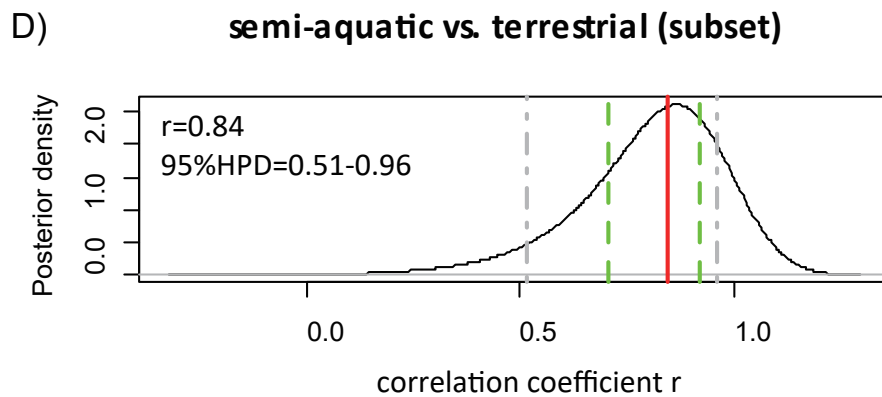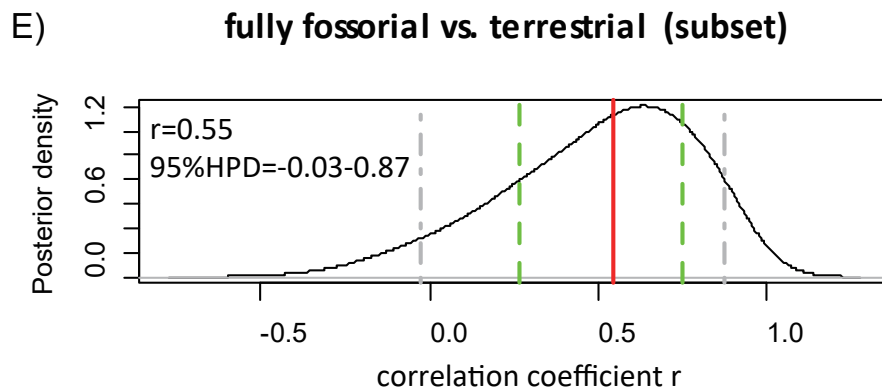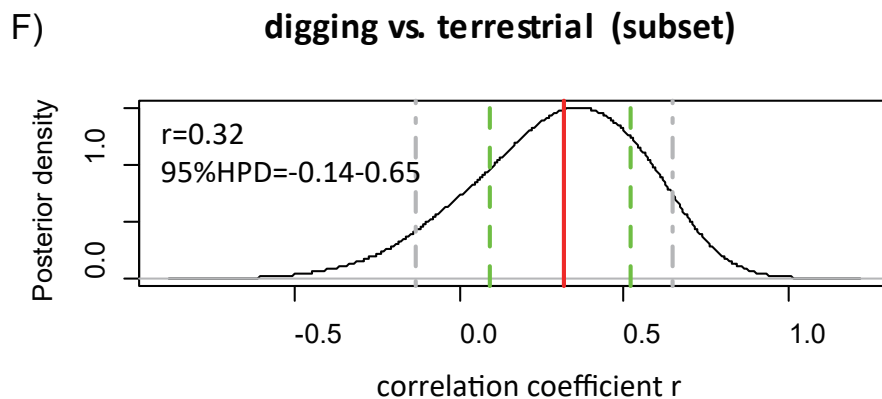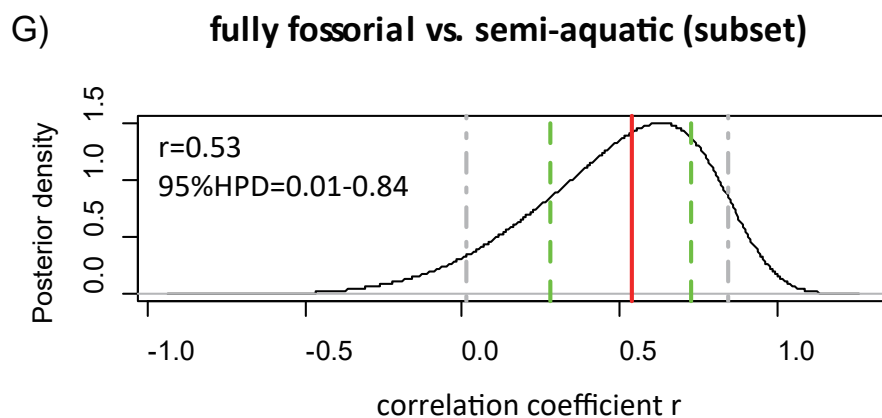

Supplement: supp [file elife_poa_e66797_Figure_5_figure_supplement_3.pdf › elife_poa_e66797_Figure_5_figure_supplement_3.pdf]
